# Supplementary material
Source: PubMed Central journal article supplement (PMC4543561)
Supplement: NIHMS695331-supplement-1.pdf [file NIHMS695331-supplement-1.pdf]

## **SUPPLEMENTARY INFORMATION**

### **A biosynthetic pathway for a prominent class of microbiota-derived bile acids**

A. Sloan Devlin and Michael A. Fischbach\*

Department of Bioengineering and Therapeutic Sciences and the California Institute for Quantitative Biosciences, University of California, San Francisco, San Francisco, CA 94158, USA

Correspondence: [fischbach@fischbachgroup.org](mailto:fischbach@fischbachgroup.org)

## Supplementary Results

a.

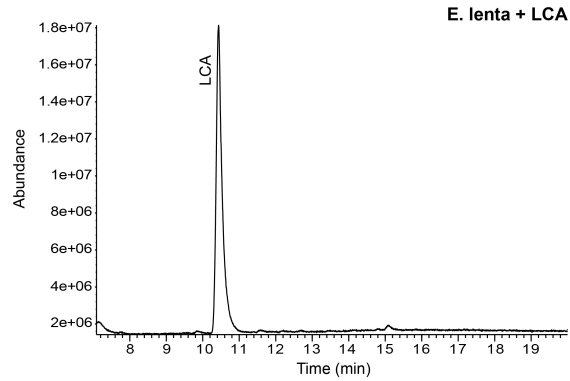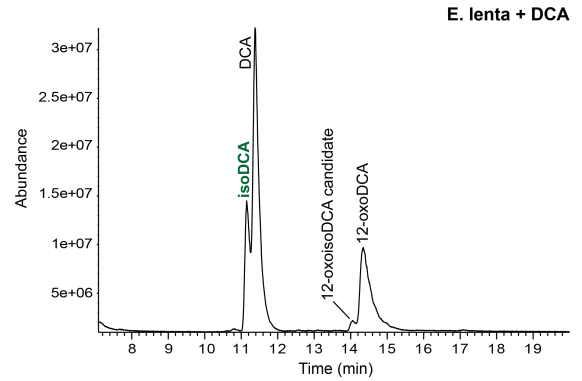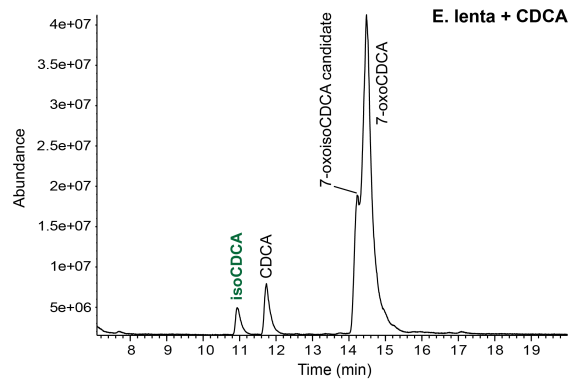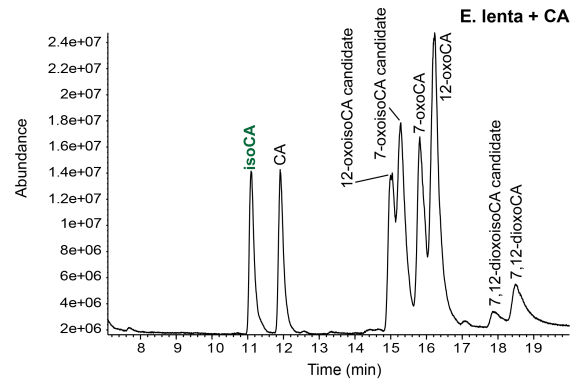

b.

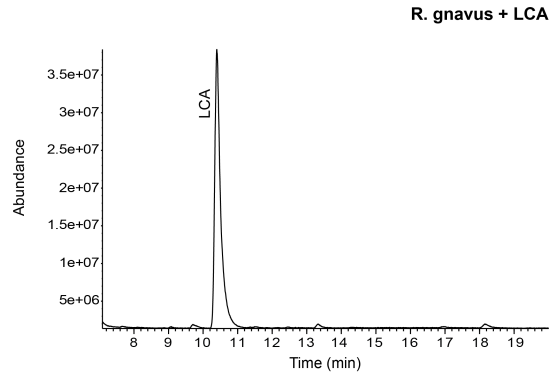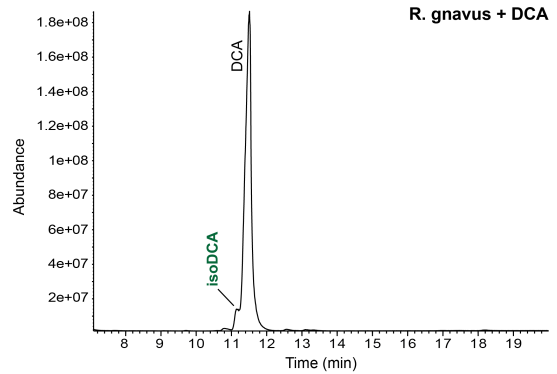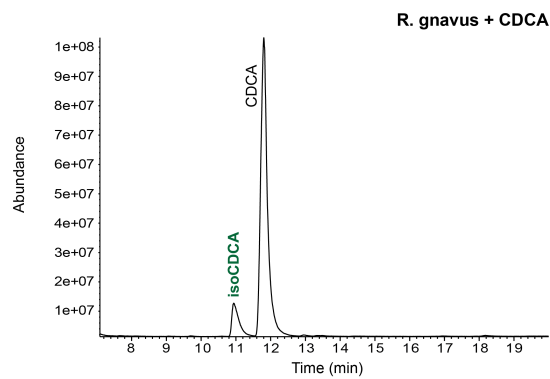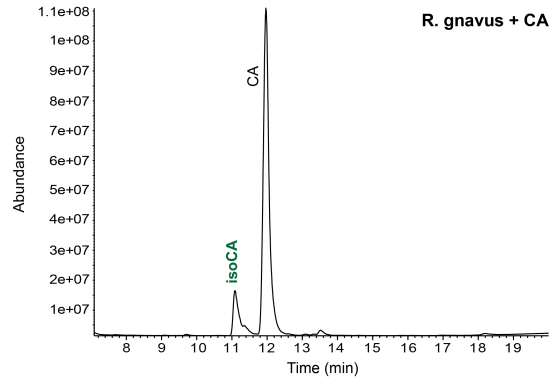

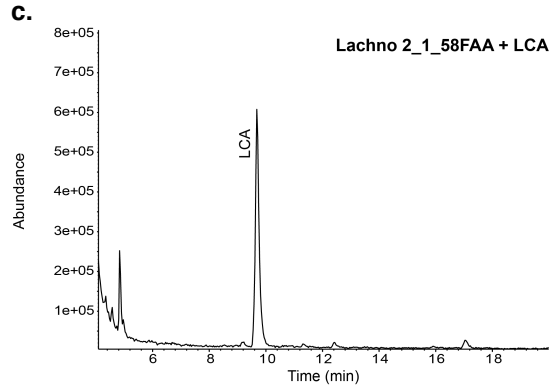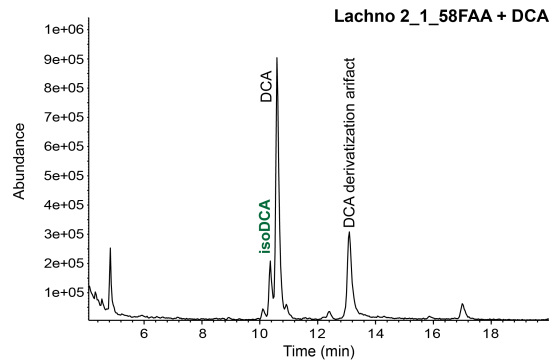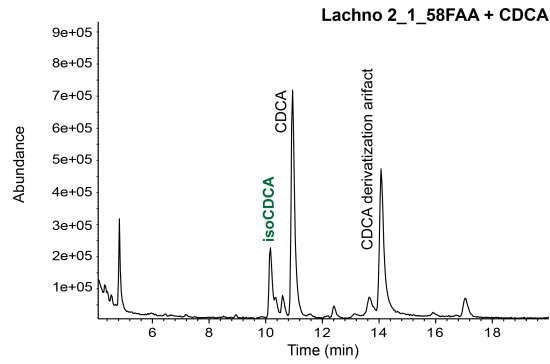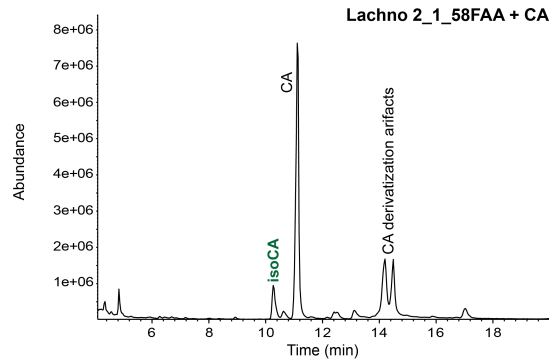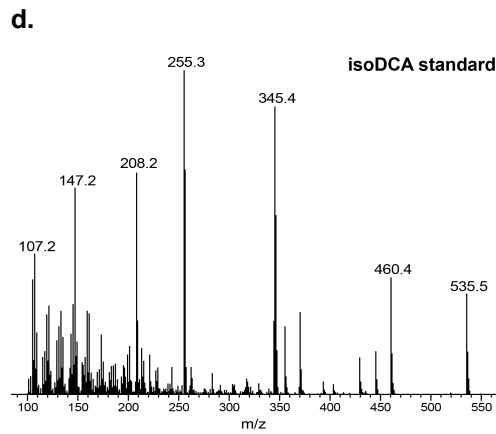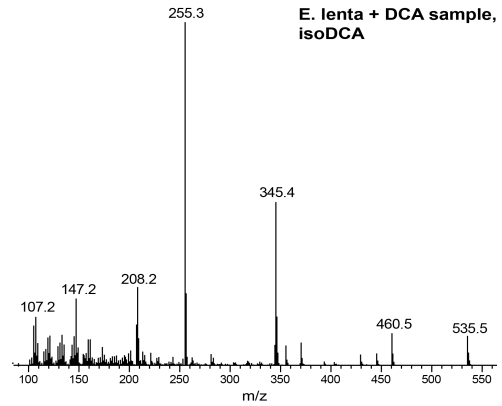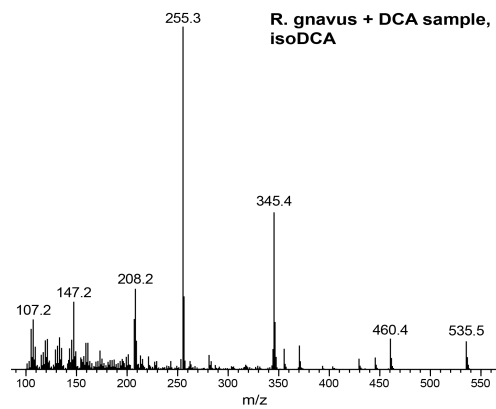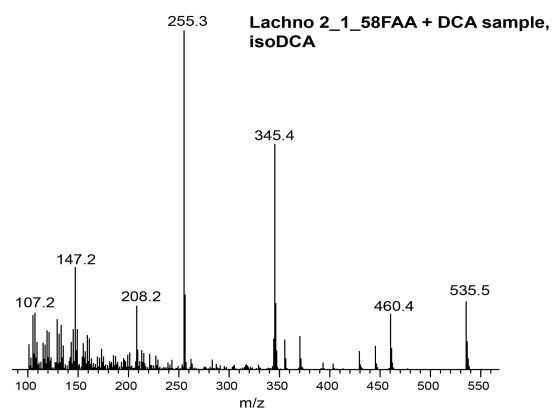

Supplementary Figure 1 (page 2 of 3)

**Supplementary Figure 1. *E. lenta*, *R. gnavus*, and *Lachnospiraceae* sp. 2\_1\_58FAA produced iso-bile acids in a whole cell screen.**

All culture reactions were quenched at t=20 h (stationary phase) by addition of 6N HCl, purified, and prepared for GC-MS analysis as described in the Online Methods. (a) *Eggerthella lenta*, (b) *Ruminococcus gnavus* and (c) *Lachnospiraceae* sp. 2\_1\_58FAA produced isoDCA, isoCDCA, and isoCA from DCA, CDCA, and CA, respectively. (d) Mass spectral fragmentation patterns of isoDCA standard (purchased from Steraloids, Inc.; retention time 11.1 min) and isoDCA (retention time 11.1 min) in experimental samples. Note that bile acid retention times were shifted in (c) due to GC-MS column maintenance. Standards were re-run under these conditions to determine retention times and to confirm mass fragmentation patterns.



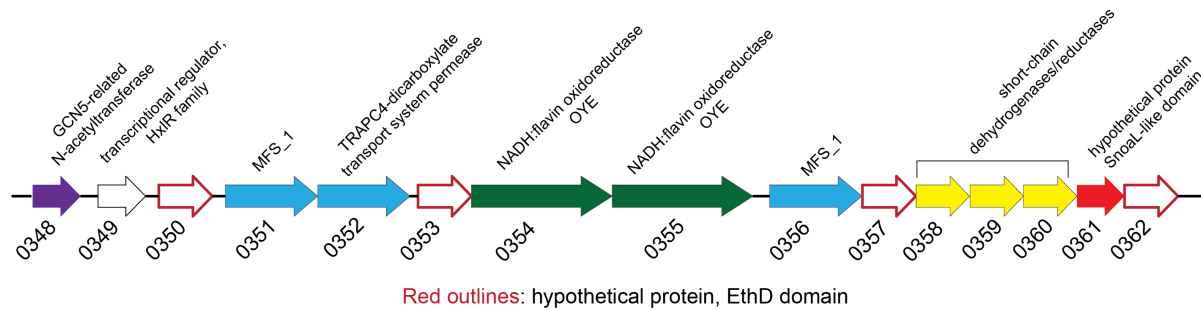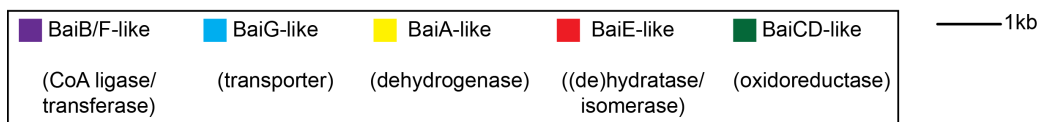

**Supplementary Figure 2. Potential bile acid metabolizing cluster in *E. lenta* DSM 2243.** Elen\_0358, Elen\_0359, and Elen\_0360 were identified as candidate HSDHs from the initial BLASTP search but were not active in the cell lysate assay.

**a.**

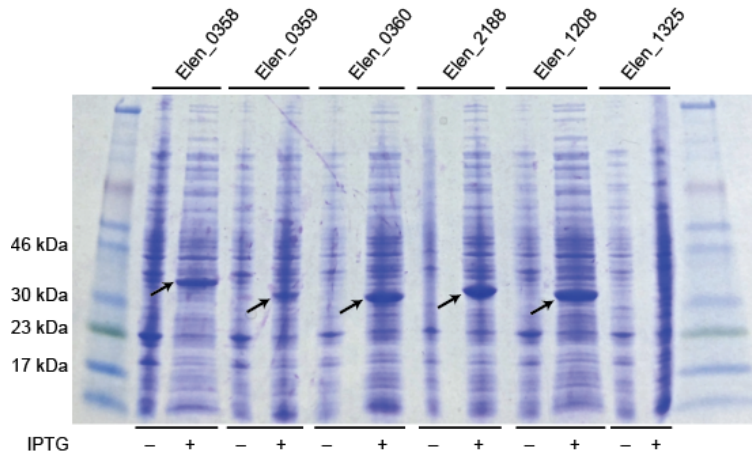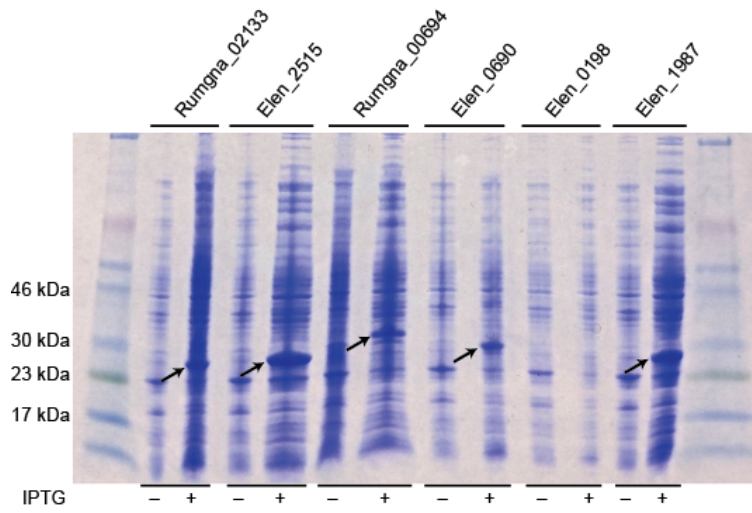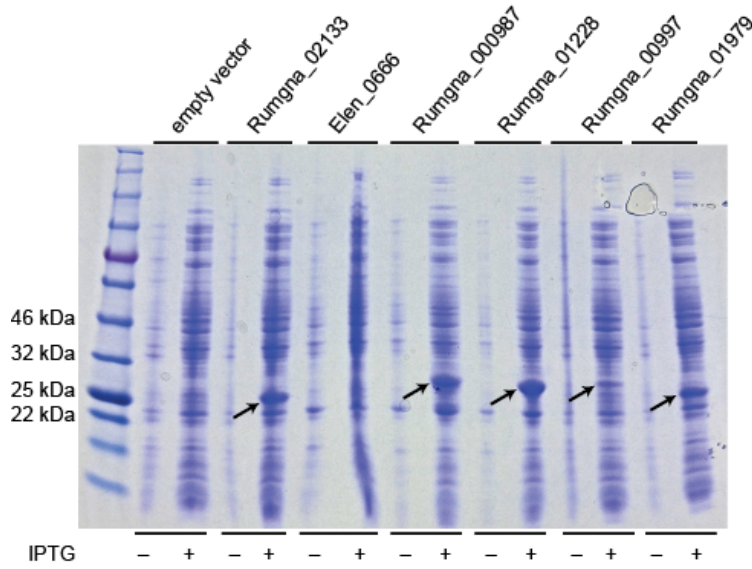

Supplementary Figure 3 (page 1 of 2)

b.

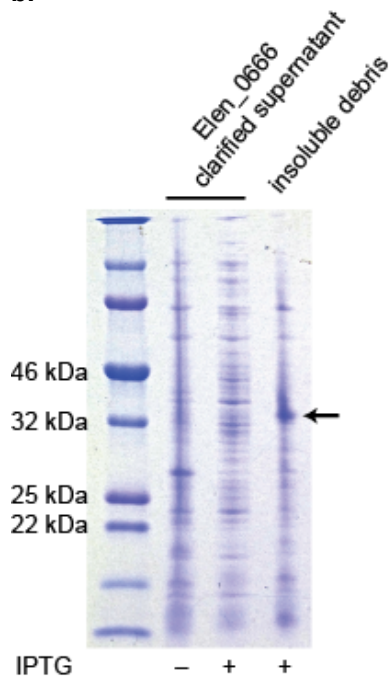

**Supplementary Figure 3. Confirmation of heterologous expression of HSDH candidate genes in *E. coli*.** (a) Clarified supernatant from either uninduced (-) or induced (+) cells was analyzed by SDS-PAGE. Elen\_0358: 31.5 kDa, Elen\_0359: 27.5 kDa, Elen\_0360: 27.0 kDa, Elen\_2188: 31.0 kDa, Elen\_1208: 29.7 kDa; Rumgna\_02133: 26.6 kDa, Elen\_2515: 27.1 kDa, Rumgna\_00694, 29.0 kDa, Elen\_0690: 27.4 kDa, Elen\_1987: 26.4 kDa; Rumgna\_00987: 26.5 kDa, Rumgna\_01228: 27.4 kDa, Rumgna\_00997: 28.1 kDa, Rumgna\_01979: 26.1 kDa. Expression of Elen\_1325 (27.3 kDa) and Elen\_0198 (27.6 kDa) was confirmed by Western blot and subsequently by SDS-PAGE analysis of purified protein (Figure S5). (b) Elen\_0666 (27.5 kDa) was expressed but insoluble.

a.

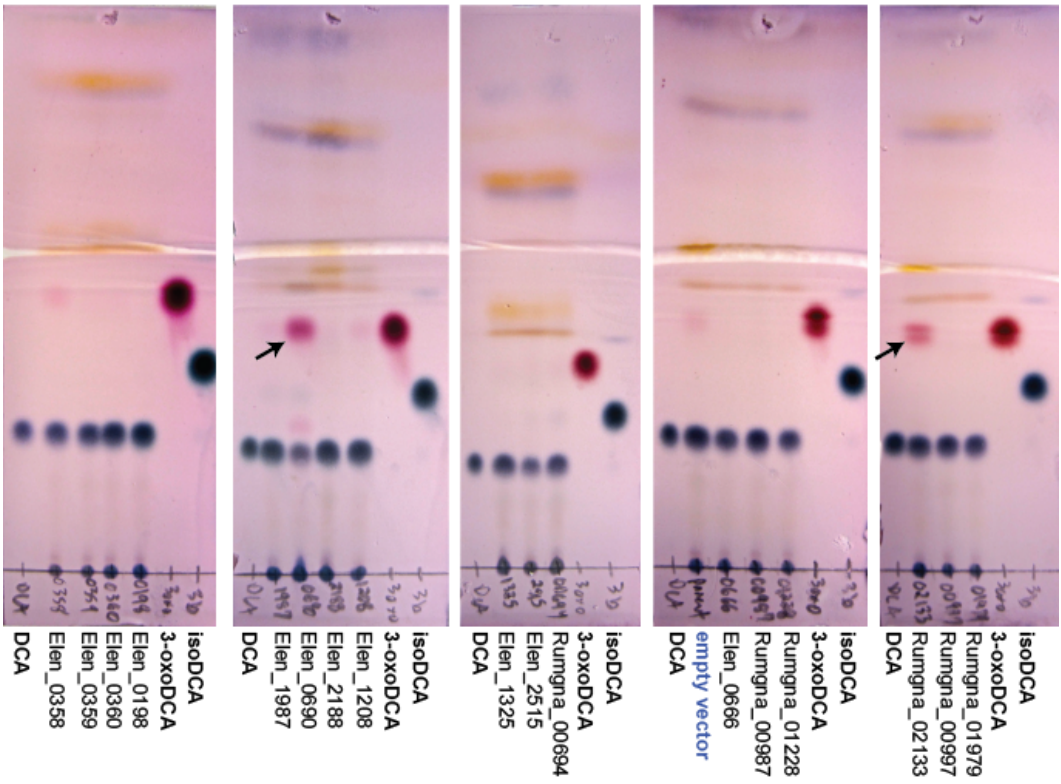

b.

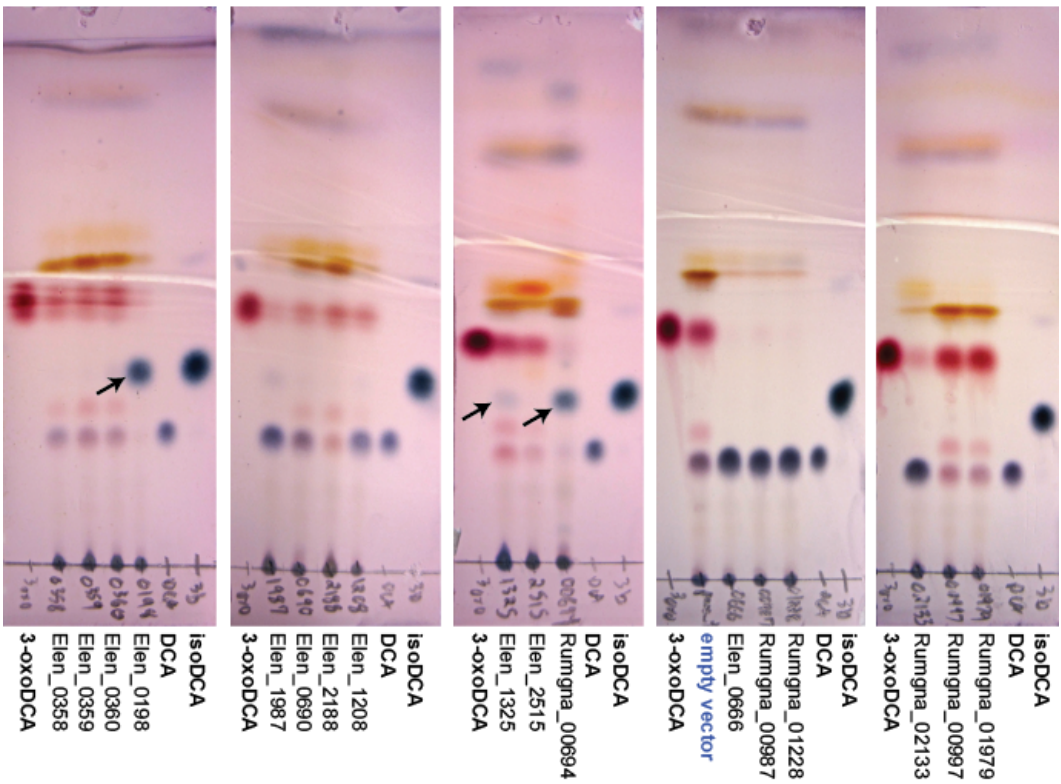

Supplementary Figure 4 (page 1 of 4)

**c.**

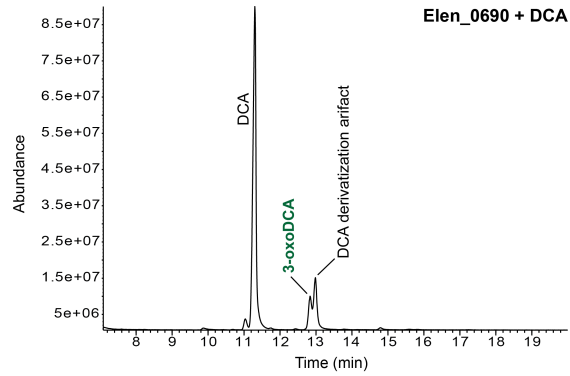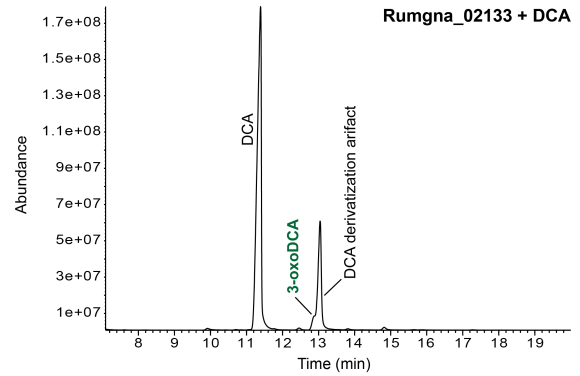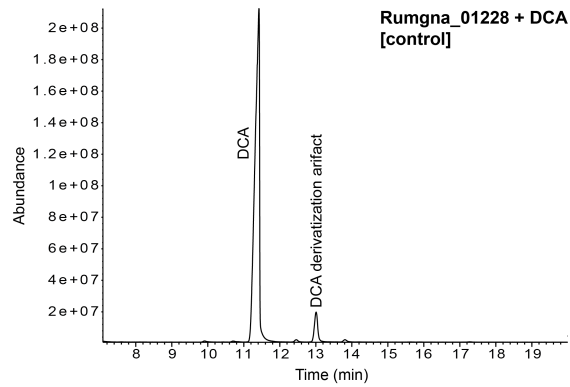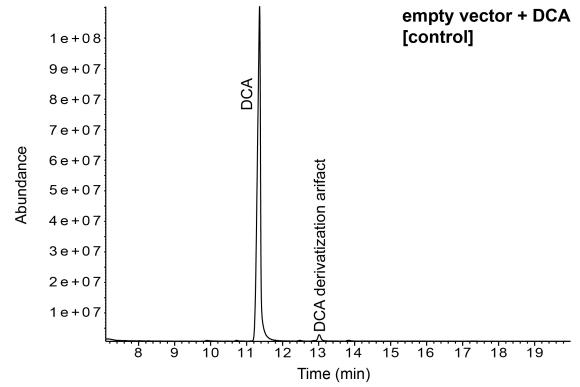

**d.**

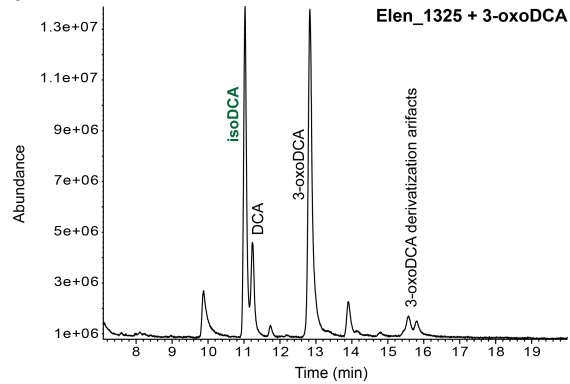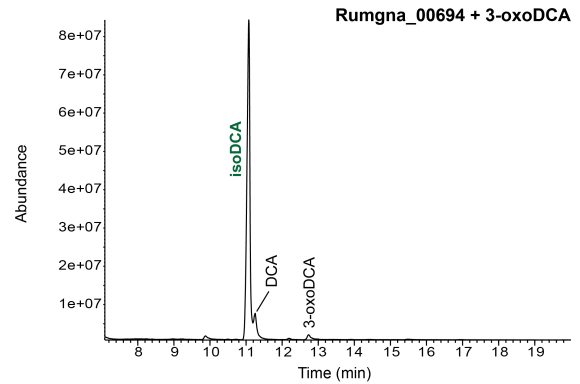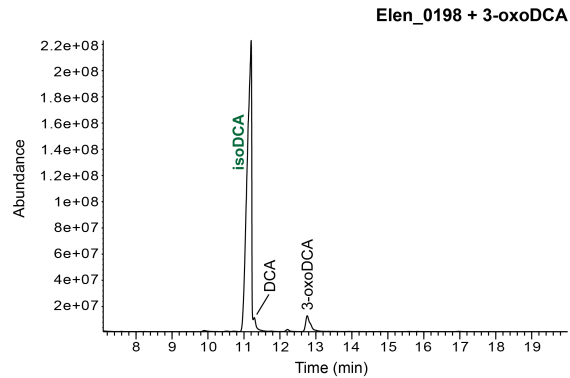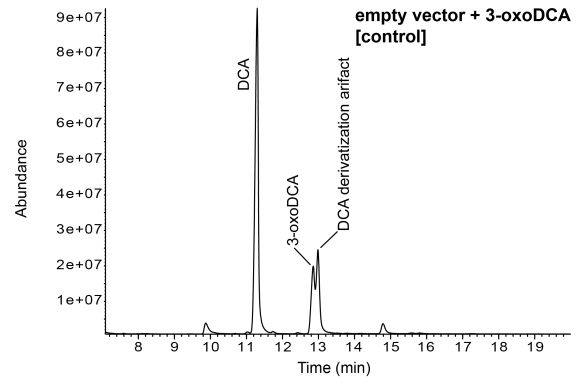

Supplementary Figure 4 (page 2 of 4)

d (cont'd).

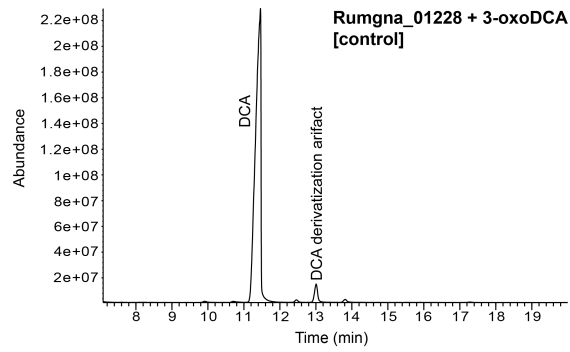

e.

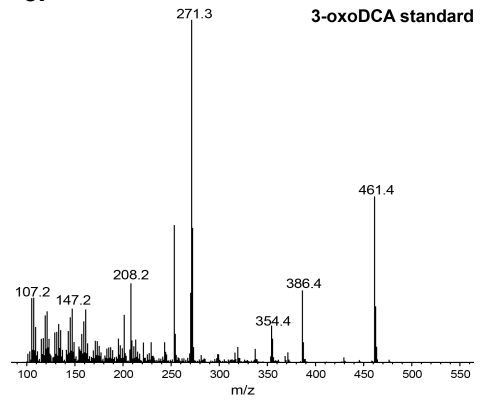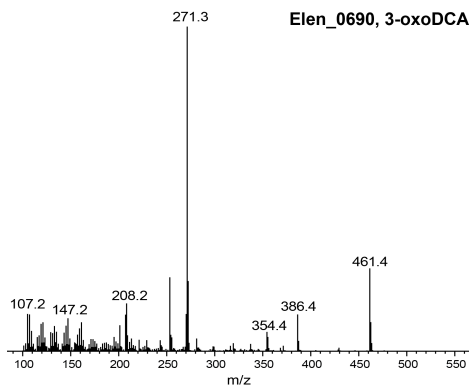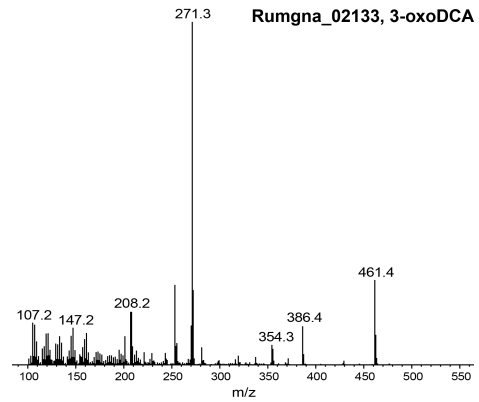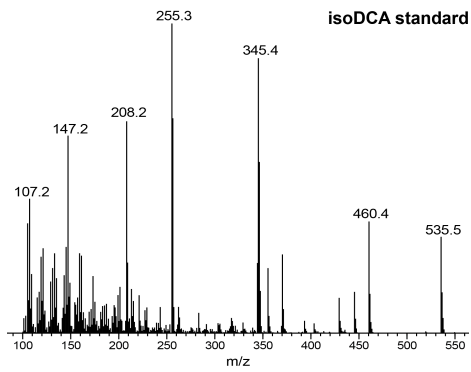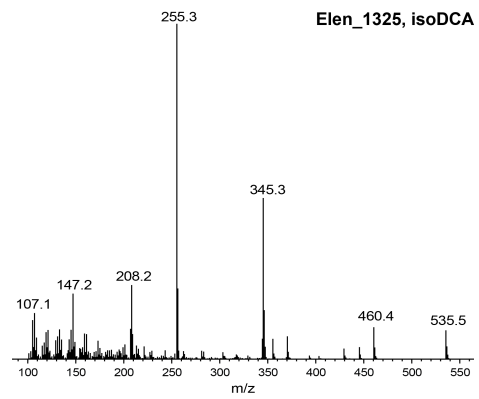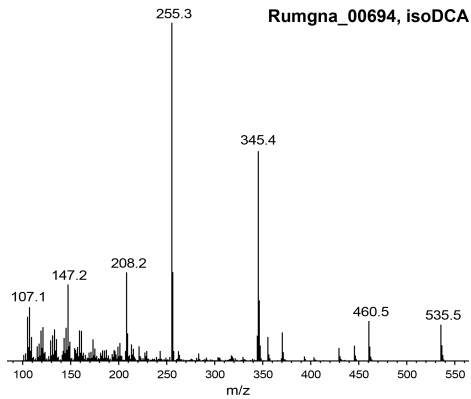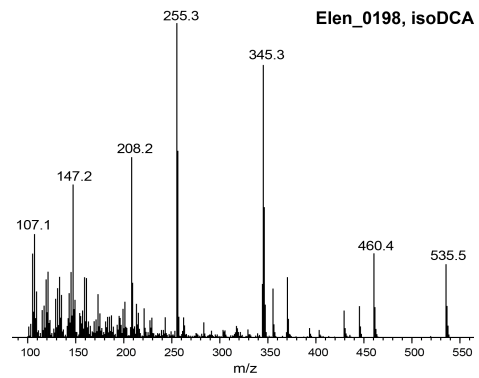

**Supplementary Figure 4. Functional 3 $\alpha$ - and 3 $\beta$ -HSDHs identified using cell lysate assay.** TLC analysis showed that **(a)** Elen\_0690 and Rumgna\_02133 transformed DCA into 3-oxoDCA and are 3 $\alpha$ -HSDHs and **(b)** Rumgna\_00694, Elen\_1325, and Elen\_0198 transformed 3-oxoDCA into isoDCA and are 3 $\beta$ -HSDHs. Because background reactivity (3-oxoDCA into DCA) was observed in the empty vector control condition, reductive 3 $\alpha$ -HSDH enzymatic activity could not be assessed using this assay. **(c)** and **(d)** GC-MS confirmed these results. Rumgna\_01228 and empty vector traces were included as negative controls for both substrates. **(e)** Mass spectral fragmentation patterns of 3-oxoDCA and isoDCA standards and in experimental samples (retention times 12.9 min, 11.1 min, respectively).



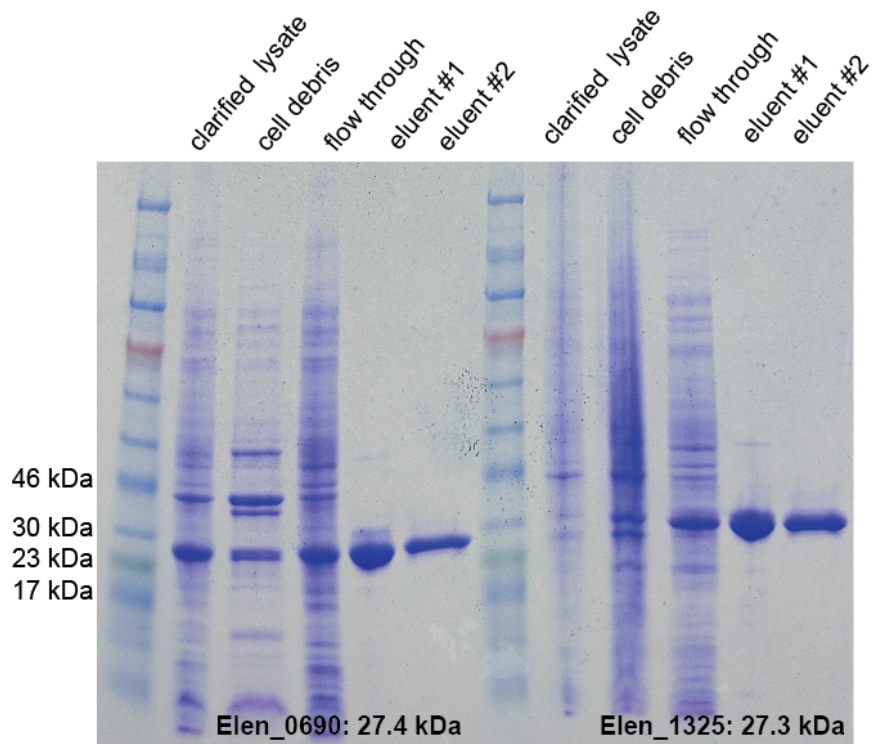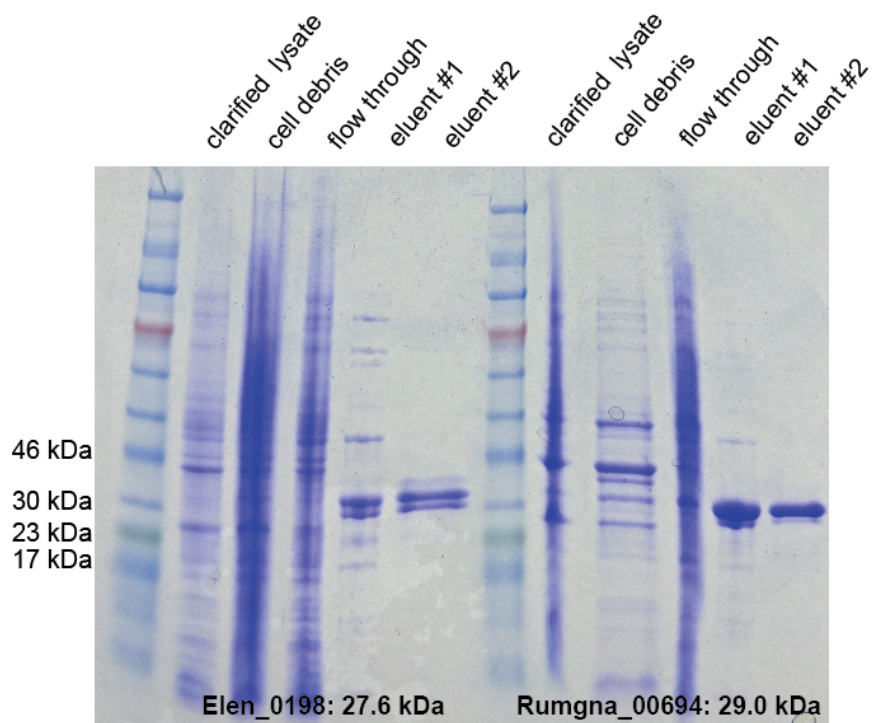

Supplementary Figure 5 (page 1 of 2)



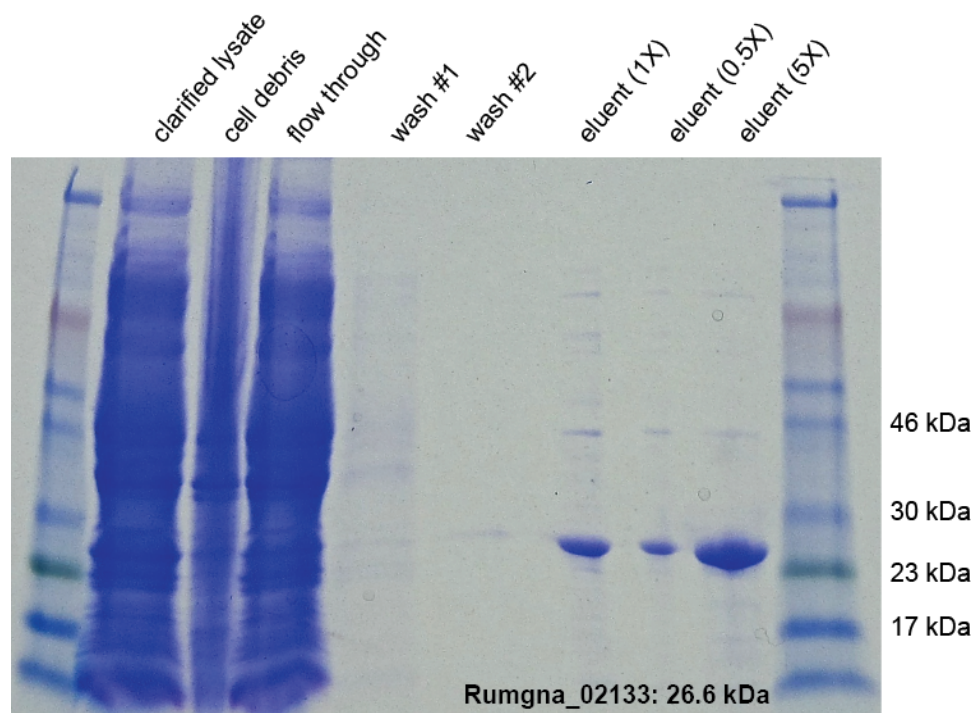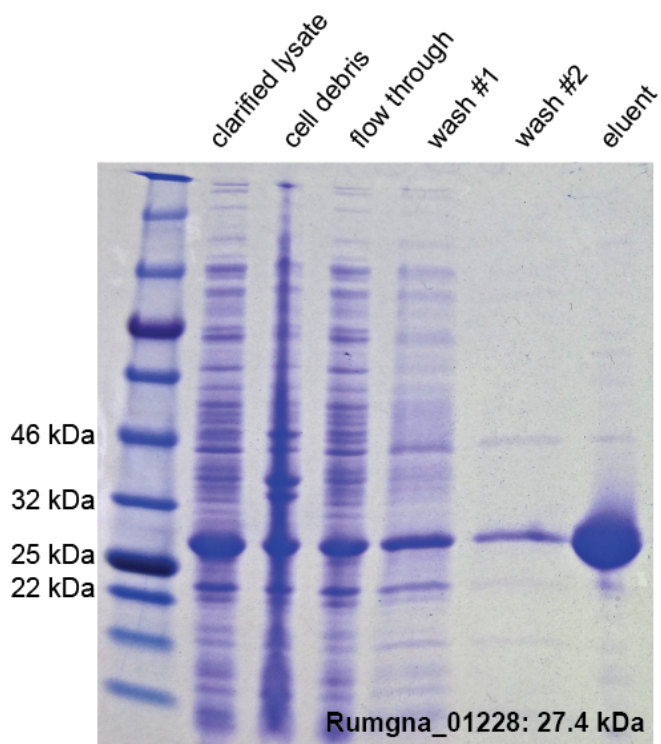

**Supplementary Figure 5. SDS-PAGE of purified enzymes.** L to R, top to bottom: Elen\_0690, Elen\_1325, Elen\_0198, Rumgna\_00694, Rumgna\_02133, and Rumgna\_01228 (purified as a negative control to use in enzymatic assays).

**a. Rumgna\_02133**

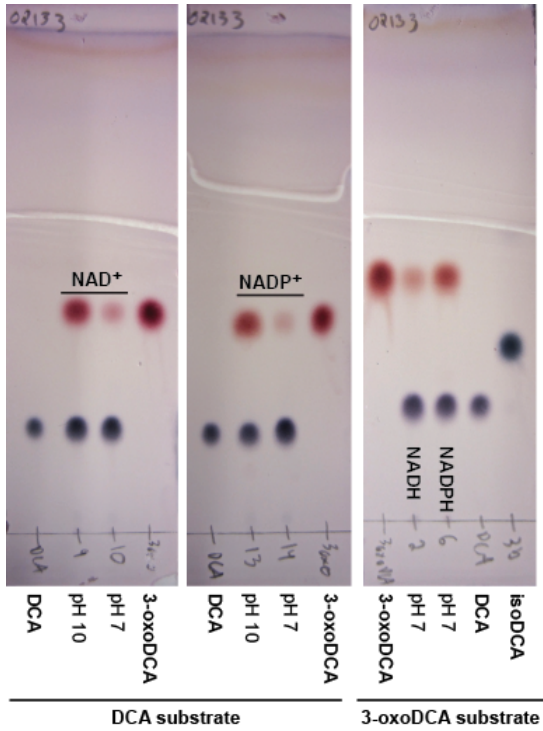

**b. Elen\_0690**

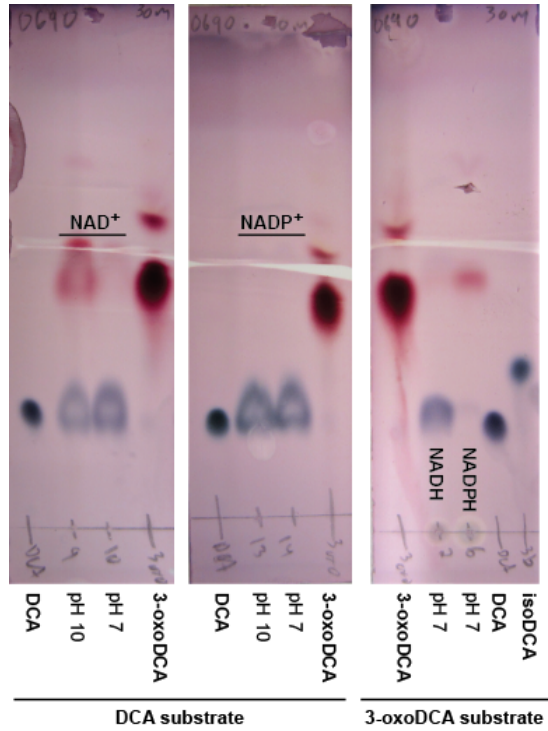

**c. Elen\_0198**

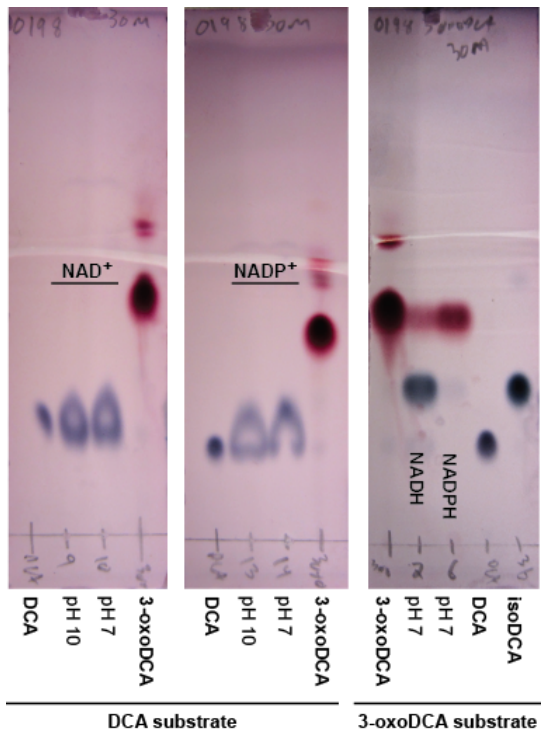

**d. Elen\_1325**

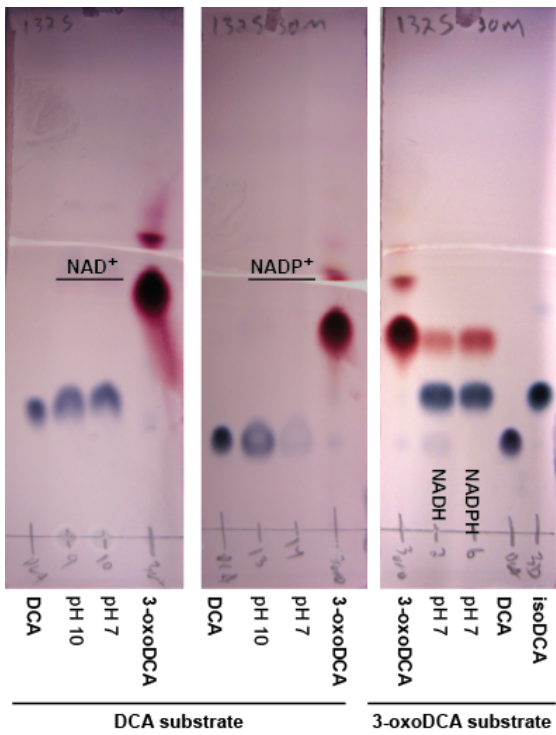

e. Rumgna\_00694

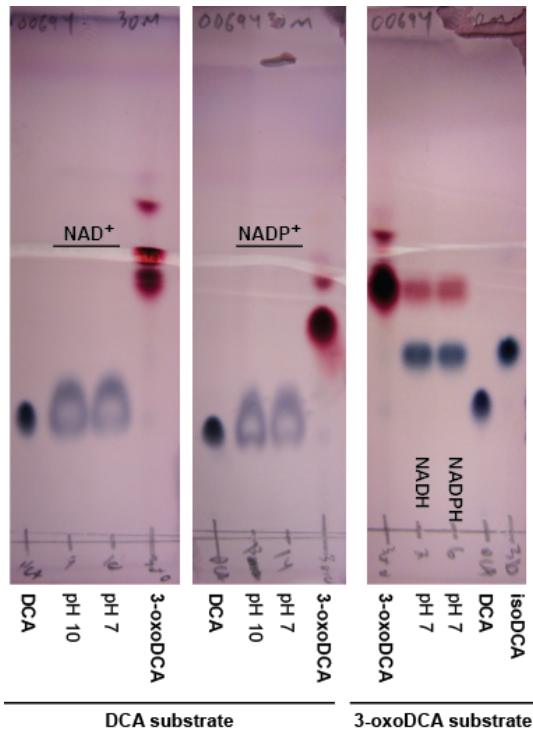

f. Rumgna\_01228 [control]

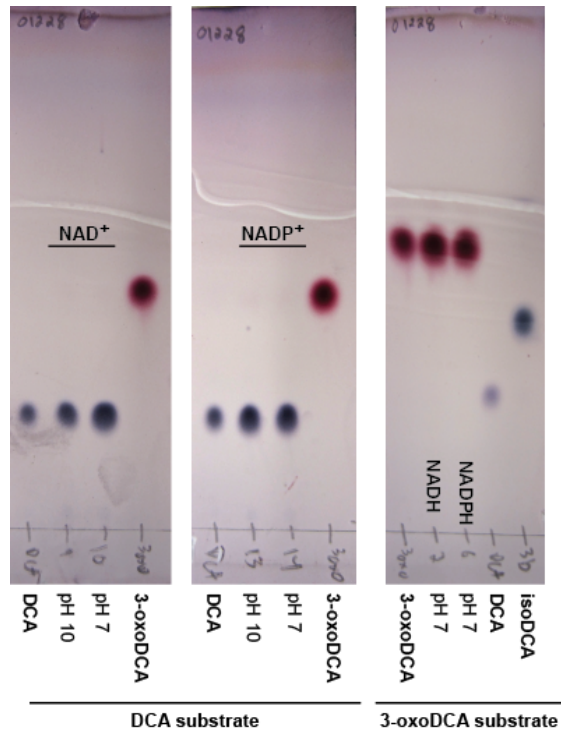

g. No enzyme [control]

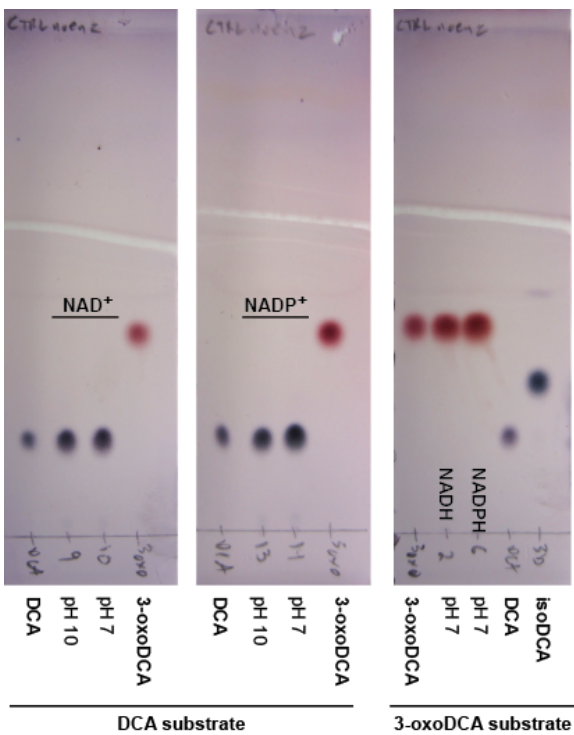

**Supplementary Figure 6. Biochemical activity of Elen\_0690, Rumgna\_02133, Elen\_0198, Elen\_1325, and Rumgna\_00694 with DCA and 3-oxoDCA as substrates: TLC analysis.** Reactions were quenched by the addition of HCl after 30 min. (A) Rumgna\_02133 is a 3 $\alpha$ -HSDH, converts DCA into 3-oxoDCA, converts 3-oxoDCA into DCA, and accepts both NADH and NADPH as cofactors. Transformation of DCA is more efficient at pH 10 than pH 7. (B) Elen\_0690 is a 3 $\alpha$ -HSDH, converts DCA into 3-oxoDCA, converts 3-oxoDCA into DCA, and prefers NADH as cofactor. Transformation of DCA is more efficient at pH 10 than pH 7. (C) Elen\_0198 is a 3 $\beta$ -HSDH, is unreactive toward DCA, converts 3-oxoDCA into isoDCA, and prefers NADH as cofactor. (D) Elen\_1325 is a 3 $\beta$ -HSDH, is unreactive toward DCA, converts 3-oxoDCA into isoDCA, and accepts both NADH and NADPH as cofactors. (E) Rumgna\_00694 is a 3 $\beta$ -HSDH, is unreactive toward DCA, converts 3-oxoDCA into isoDCA, and accepts both NADH and NADPH as cofactors. (F) and (G) Lack of transformation of either DCA or isoDCA in Rumgna\_01228 and no enzyme controls confirmed that conversion to product was due to enzymatic activity.

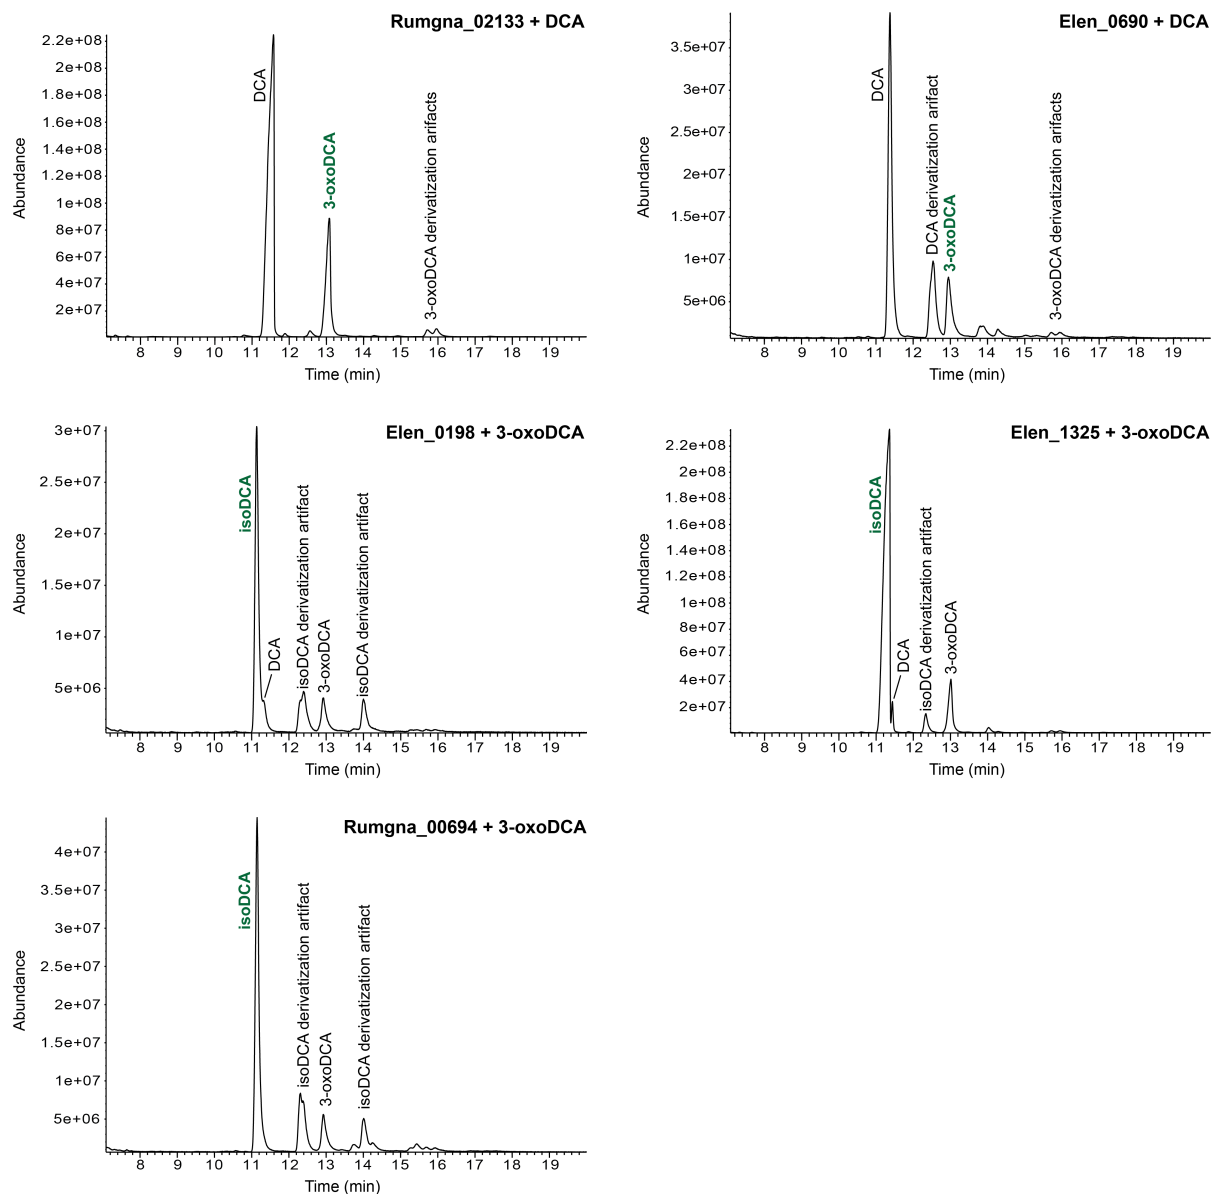

**Supplementary Figure 7. Biochemical activity of Elen\_0690, Rumgna\_02133, Elen\_0198, Elen\_1325, and Rumgna\_00694 with DCA and 3-oxoDCA as substrates: GC-MS confirmation.** GC-MS traces of purified TLC samples from Figure S6 showing conversion of DCA to 3-oxoDCA by Rumgna\_02133 and Elen\_0690 (pH 7) and conversion of 3-oxoDCA to isoDCA by Elen\_0198, Elen\_1325, and Rumgna\_00694 (pH 10). The relative ratio of 3-oxoDCA to (iso)DCA in these traces is lower than the ratio apparent by TLC due to the difficulty of derivatizing 3-oxo bile acids for GC-MS analysis.<sup>1</sup>

<sup>1</sup> Lawson, A. M. & Setchell, K. D. R. Mass spectrometry of bile acids. In *The Bile Acids: Chemistry, Physiology, and Metabolism* Vol. 4 (eds. Setchell, K. D. R., Kritchevsky, D. & Nair, P. P.) 167–267 (Plenum Press, New York, USA, 1988).



**a.**

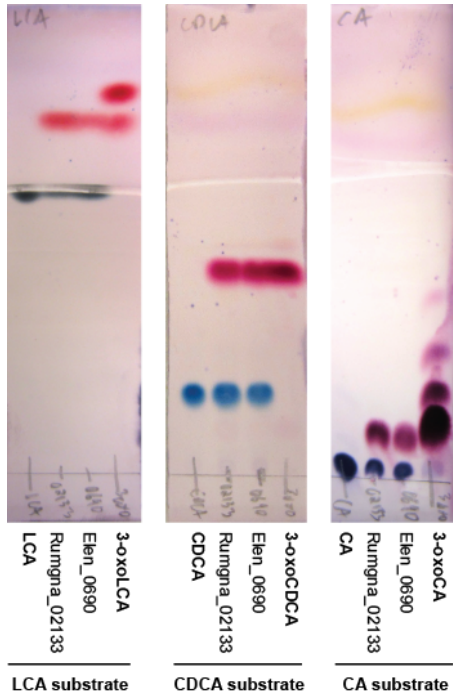

**b.**

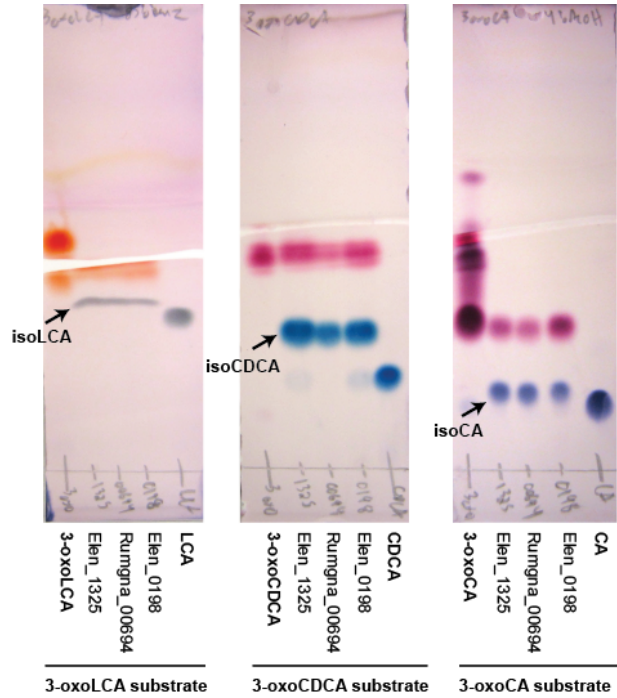

**c.**

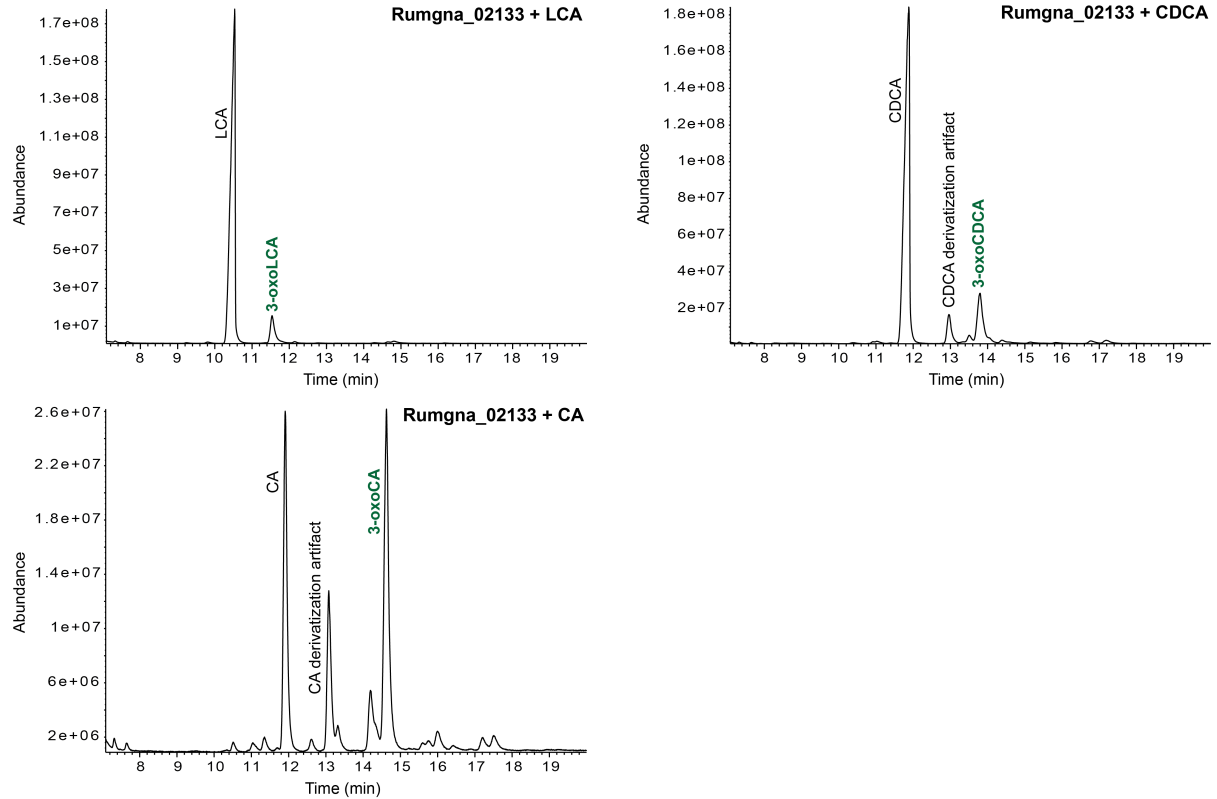

d.

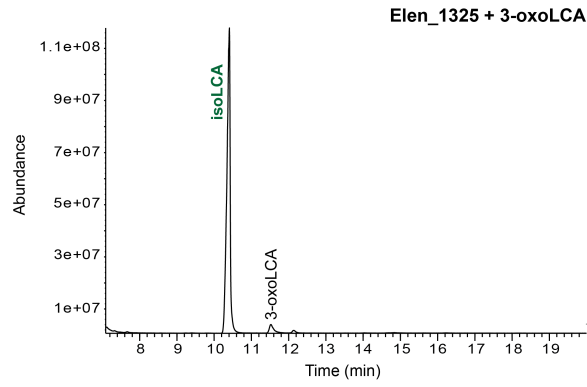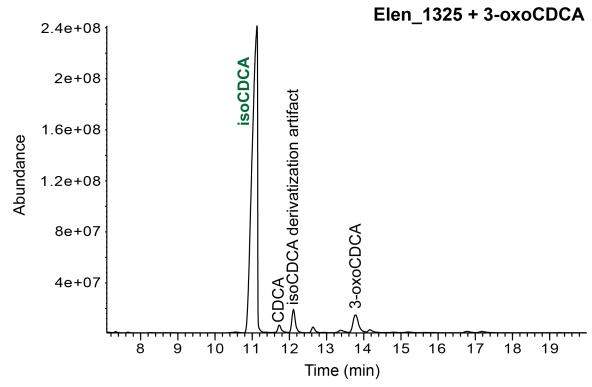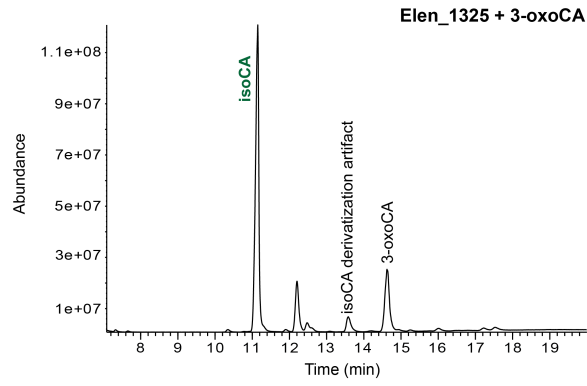

e.

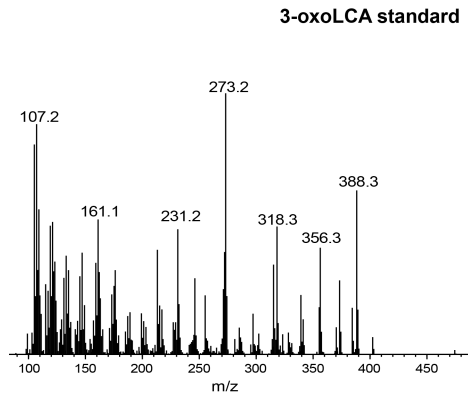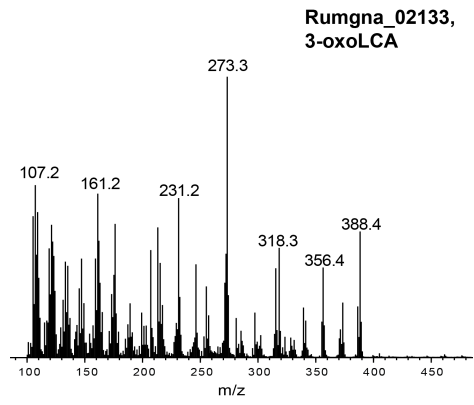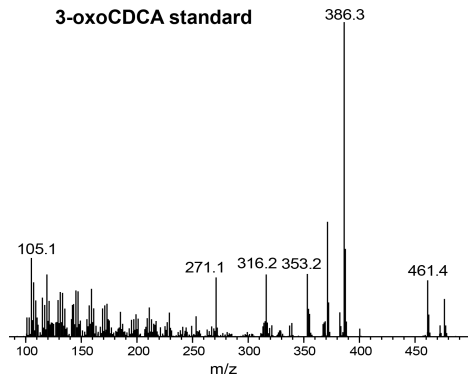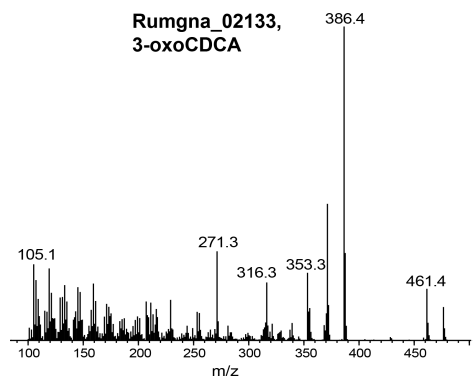

Supplementary Figure 8 (page 2 of 3)

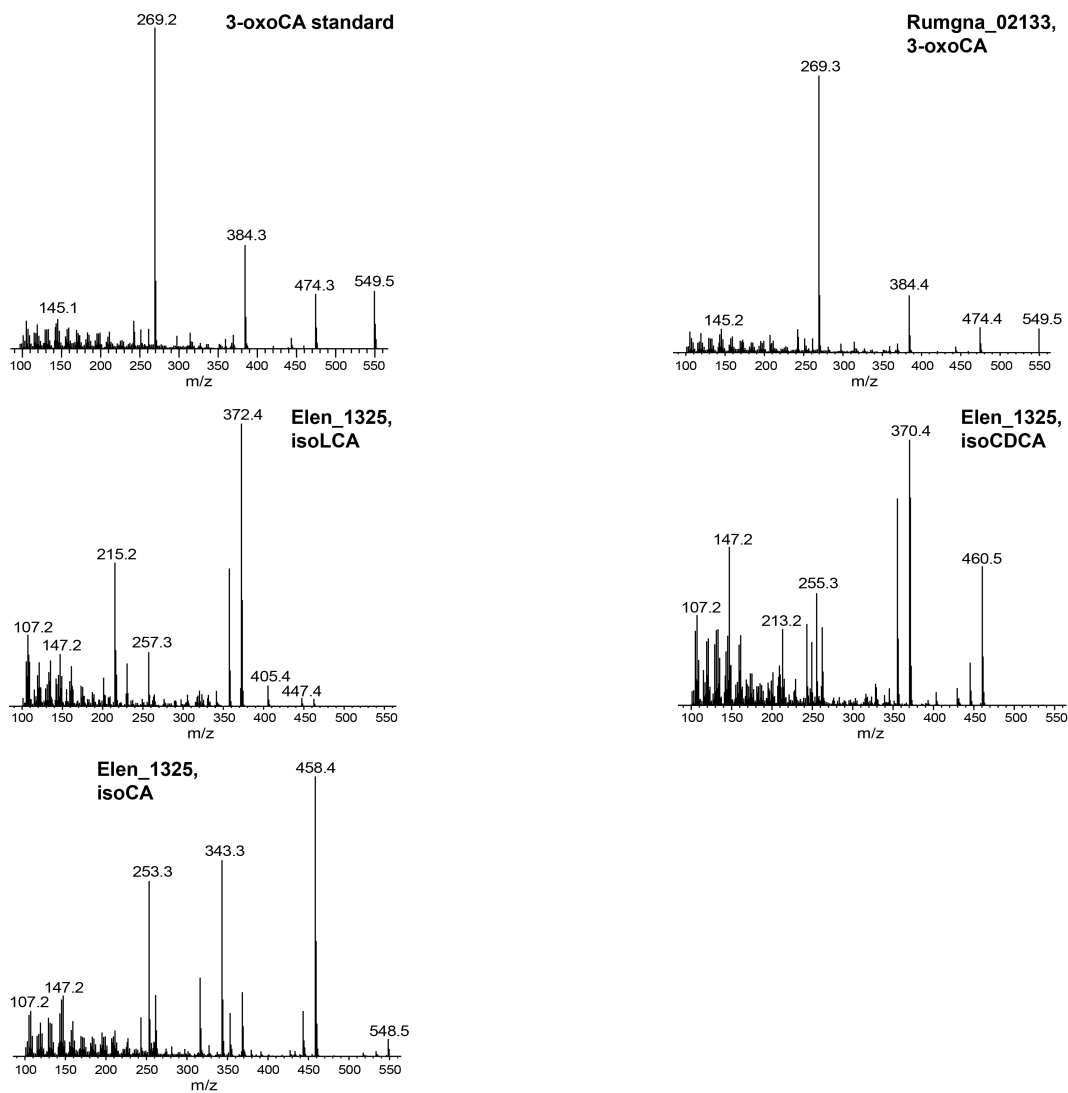

**Supplementary Figure 8. Biochemical activity of Elen\_0690, Rumgna\_02133, Elen\_0198, Elen\_1325, and Rumgna\_00694 with alternative bile acid substrates.** TLC analysis showing conversion of (a) LCA, CDCA, and CA into 3-oxoLCA, 3-oxoCDCA, and 3-oxoCA, respectively, by Rumgna\_02133 and Elen\_0690 and (b) 3-oxoLCA, 3-oxoCDCA, and 3-oxoCA into isoLCA, isoCDCA, and isoCA, respectively, by Elen\_1325, Rumgna\_00694, and Elen\_0198. The 3-oxoCA substrate TLC plate was run at a higher polarity (70:20:4 benzene/dioxane/AcOH) to obtain better separation of the isoCA product from the CA standard. These results were confirmed by GC-MS, and representative traces for (c) one 3 $\alpha$ -HSDH (Rumgna\_02133) and (d) one 3 $\beta$ -HSDH are shown. (e) Mass spectral fragmentation patterns of 3-oxoLCA, 3-oxoCDCA, and 3-oxoCA standards and in experimental samples (retention times 11.6, 13.8 min, and 14.7 min, respectively); isoLCA, isoCDCA, and isoCA in experimental samples (retention times 10.4, 11.0, and 11.1 min, respectively) (identities determined as described in the Methods section).

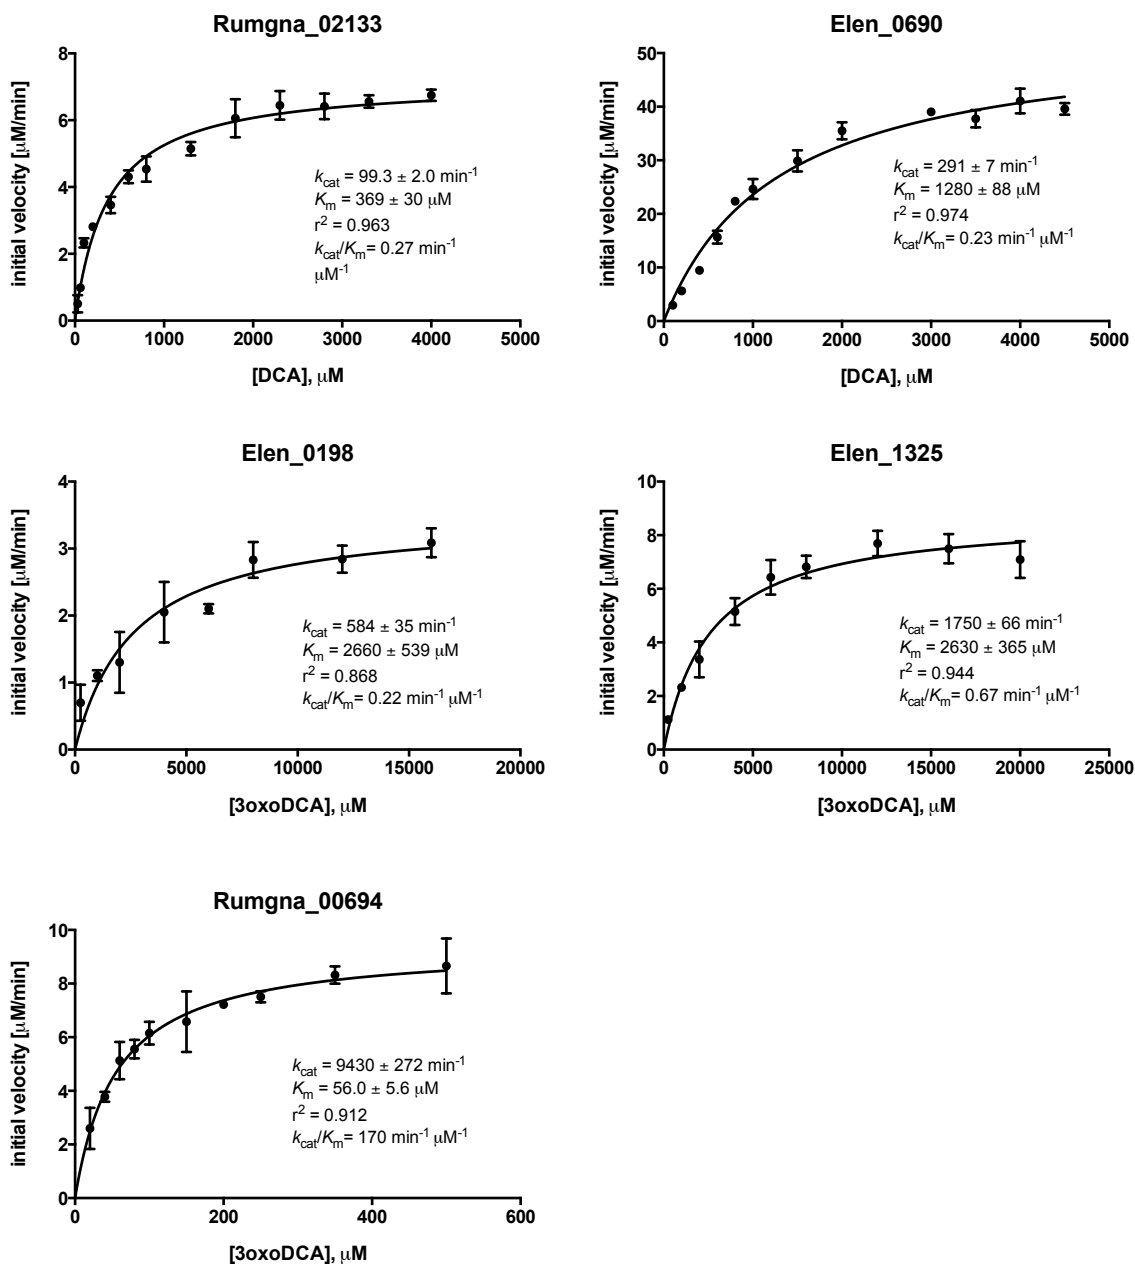

**Supplementary Figure 9. Michaelis-Menten analysis of kinetic data.** Rate vs substrate concentration curves for Rumgna\_02133 (72.4 nM, DCA substrate, n=4 experiments), Elen\_0690 (185 nM, DCA substrate, n=5), Elen\_0198 (6 nM, 3-oxoDCA substrate, n=4), Elen\_1325 (5 nM, 3-oxoDCA substrate, n=3), and Rumgna\_00694 (1 nM, 3-oxoDCA substrate, n=4). Each data point for all five enzymes was obtained under initial velocity conditions in which less than 10% starting material was consumed. Graphpad was used to fit the Michaelis-Menten equations. Note: previously reported oxidative HSDH kinetic parameters have been determined at the optimal pH of the enzymes (8.5–10), as the reaction rate was observed to decrease significantly at lower pH. We observed similar pH-dependent behavior for DCA oxidation by Rumgna\_02133 and Elen\_0690. As a result, because all kinetic experiments herein were performed at physiological pH (7.0), lower  $k_{\text{cat}}$  values were obtained for these two enzymes than typical literature values for similar enzymes.



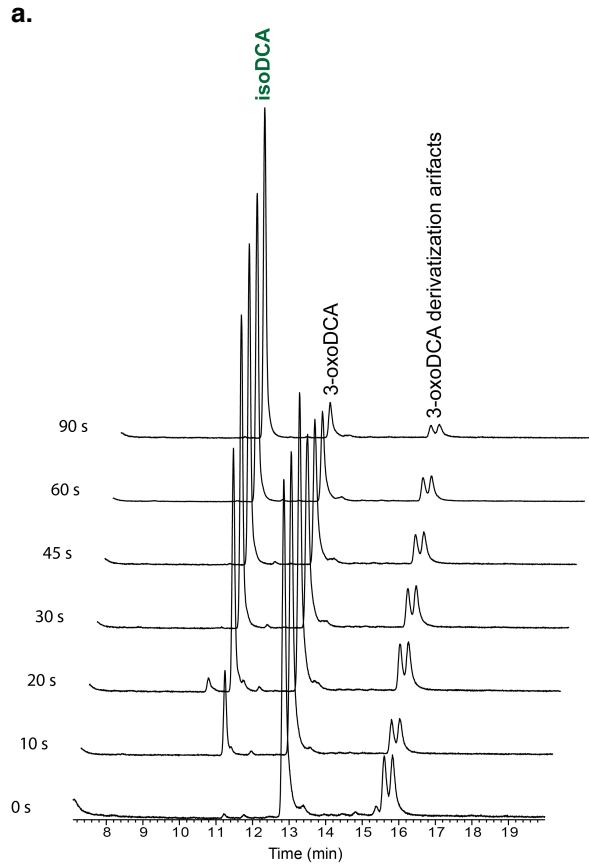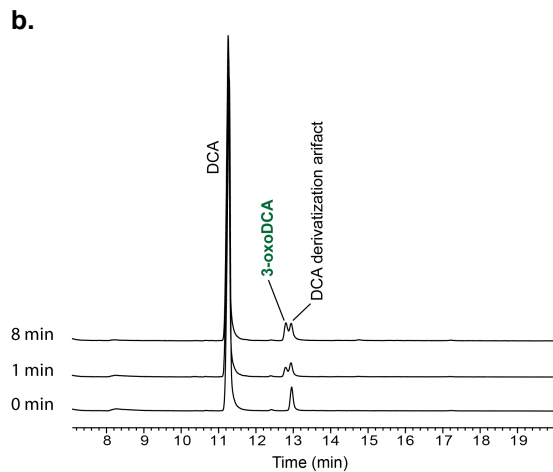

**Supplementary Figure 10. Representative time courses for 3 $\alpha$ -HSDH and 3 $\beta$ -HSDH activity.** Purified protein was added to a solution of 2.5 mL of buffer, substrate, and cofactor at 37 °C. Aliquots of 250  $\mu$ L were removed and quenched with 250  $\mu$ L 6N HCl. Samples were purified and analyzed by GC-MS as described in the Materials and Methods. Aliquots for t=0 timepoints were removed immediately prior to addition of enzyme. Note that the relative amount of 3-oxoDCA in these traces is suppressed in comparison to (iso)DCA due to the difficulty of derivatizing 3-oxo bile acids. (a) 10 nM Rumgna\_00694, 10 mM MOPS buffer, pH 7, 3-oxoDCA substrate, 400  $\mu$ M final concentration, NADPH, 400  $\mu$ M final concentration. (b) 100 nM Elen\_0690, 0.2N glycine-NaOH buffer, pH 10, DCA, 400  $\mu$ M final concentration, NAD<sup>+</sup>, 400  $\mu$ M final concentration.

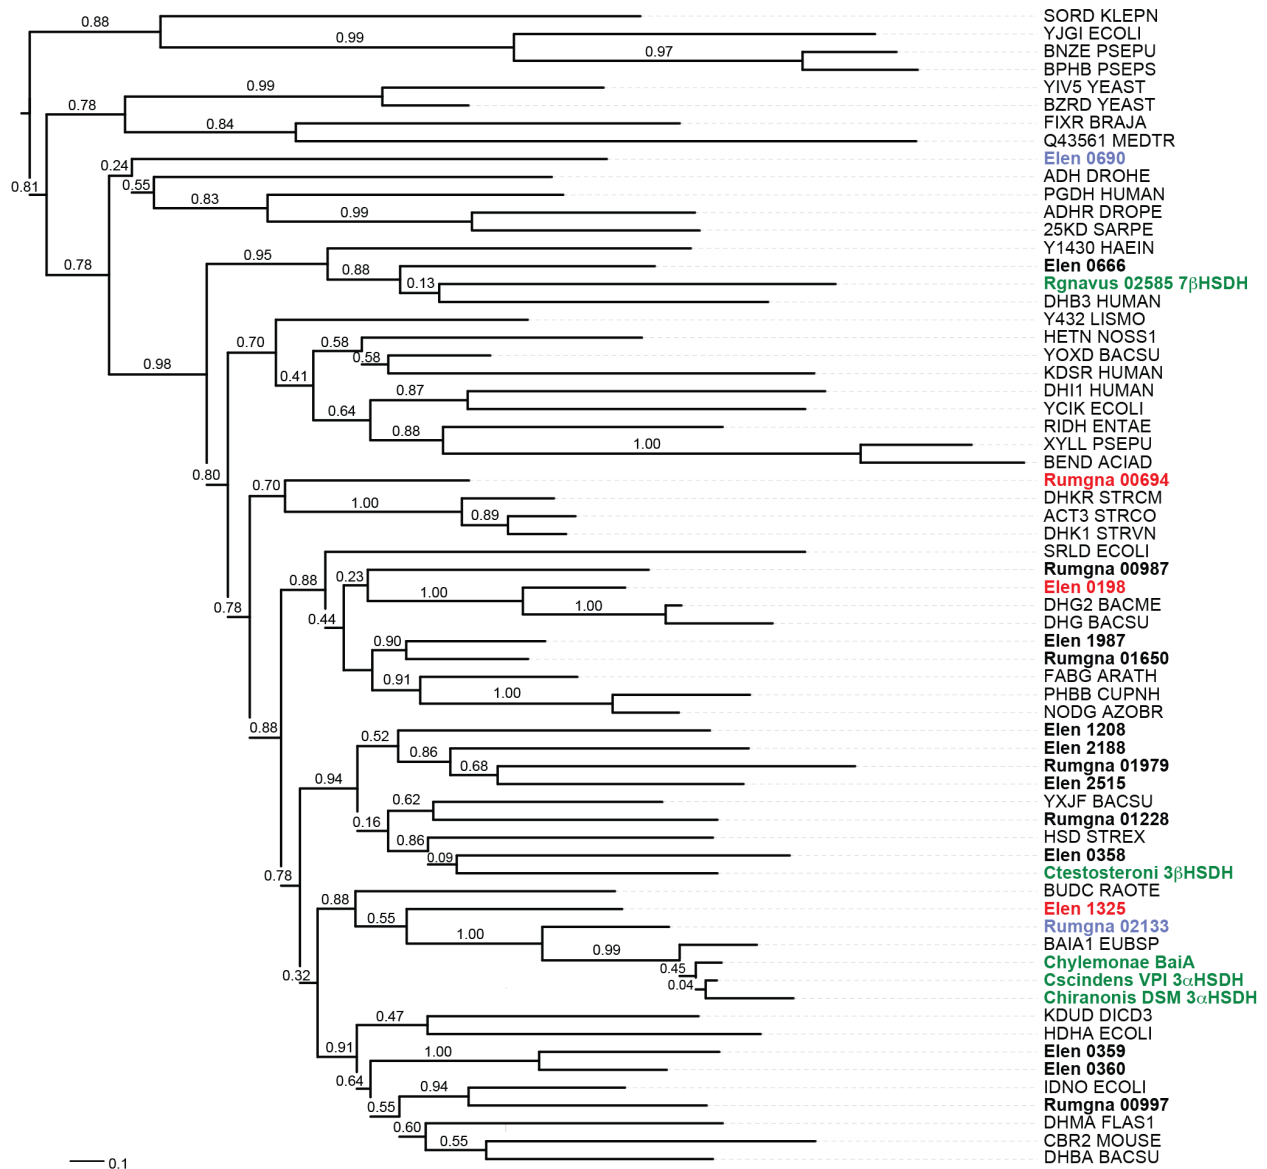

**Supplementary Figure 11. Phylogenetic tree of candidate and query HSDH genes.** Numbers next to the branches represent the percentage of replicate trees in which this topology was reached in a bootstrap test of 1,000 replicates. Green text indicates query genes from the BLASTP search, blue text indicates 3 $\alpha$ -HSDHs identified from the cell lysate assay, red text indicates 3 $\beta$ -HSDHs, and bold black text indicates HSDH candidates that were not active in the cell lysate assay.

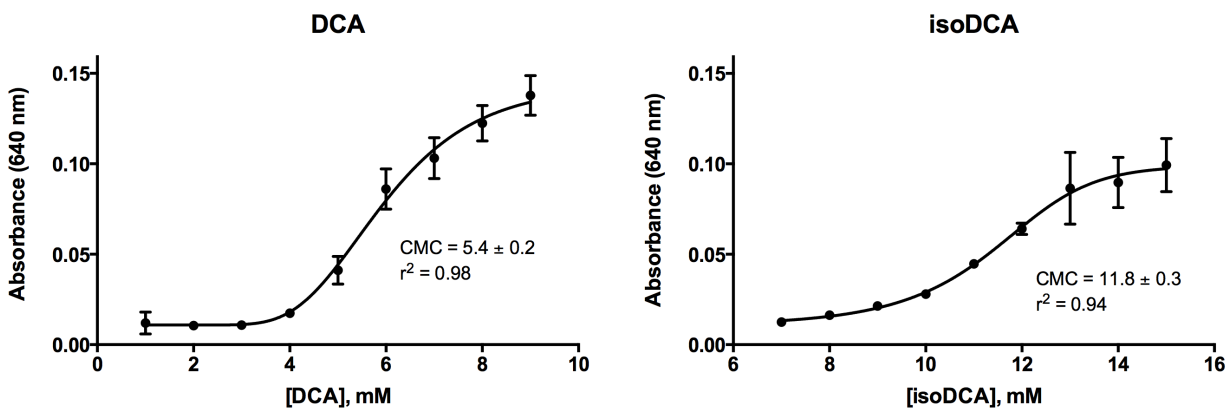

Curves fit to the following 5-parameter logistic growth equation:

$$y = F + \frac{D - F}{(1 + 10^{(G-x)B})^C}$$

where  $G = A + \frac{1}{B} \log_{10}(2^{1/C} - 1)$

Inflection point =  $A + \frac{1}{B} \log_{10}((2^{1/C} - 1)C)$

| Curve parameters        | DCA curve             | isoDCA curve |
|-------------------------|-----------------------|--------------|
| <i>A</i>                | 5.9                   | 11.5         |
| <i>B</i>                | 0.33                  | 0.54         |
| <i>C</i>                | 1.1 × 10 <sup>6</sup> | 0.54         |
| <i>D</i>                | 0.14                  | 0.10         |
| <i>F</i>                | 0.011                 | 0.011        |
|                         |                       |              |
| <b>Inflection point</b> | 5.4 ± 0.2             | 11.8 ± 0.3   |

### Supplementary Figure 12. Critical micelle concentrations (CMCs) of DCA and isoDCA.

The critical micelle concentrations of DCA and isoDCA were determined to be ~ 5 mM and 12 mM, respectively. Absorbance data from three independent experiments was plotted versus detergent concentration for each compound. A standard five-parameter logistic curve fit was performed using Graphpad, and the critical micelle concentration was determined by computing the associated inflection point of each curve.<sup>1</sup> Inflection point values represent mean ± s.e.m.

<sup>1</sup> Gottschalk, P. G. & Dunn, J. R. The five-parameter logistic: a characterization and comparison with the four-parameter logistic. *Anal. Biochem.* **343**, 54–56 (2005).

a.

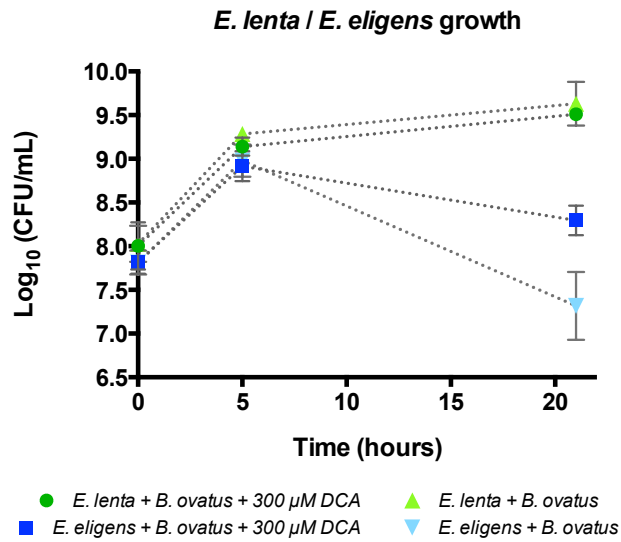

b.

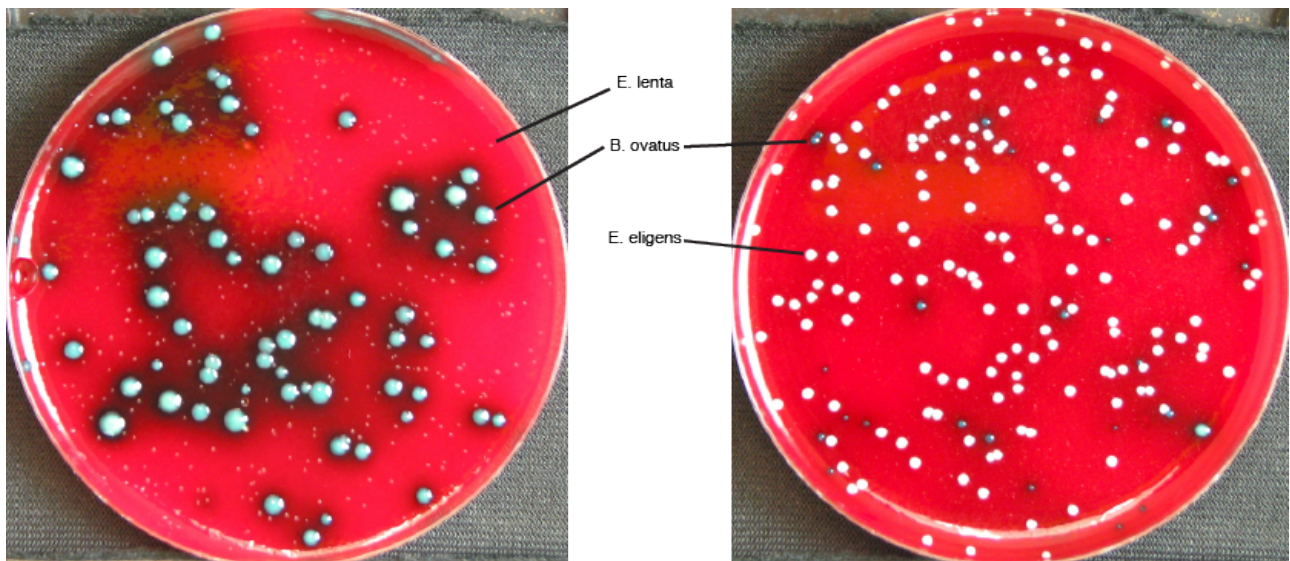

**Supplementary Figure 13. Co-culture experiment.**

(a) Growth of either the isoDCA producer *eggerthella lenta* or the common gut commensal and non-producer *Eubacterium eligens* in co-culture with *Bacteroides ovatus* with or without 300  $\mu$ M DCA (starting concentration). *E. lenta* growth (green triangles, green circles) in *E. lenta* + *B. ovatus* co-cultures is largely unaffected by the addition of DCA, while *E. eligens* grows more robustly (blue squares, blue triangles) in the presence of DCA, likely due to the growth inhibition of *B. ovatus* by DCA. Data shown are from three biological replicates. Error bars represent standard deviation. (b) Representative examples of BHI + 10% horse blood + X-gal plates showing the difference between translucent *E. lenta* colonies (left), white *E. eligens* colonies (right), and blue *B. ovatus* colonies (both).

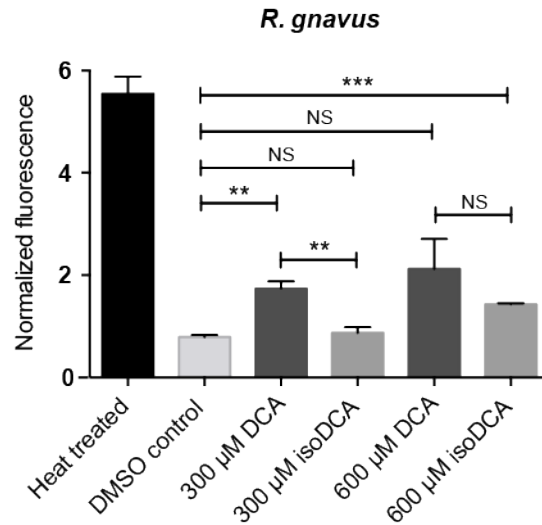

**Supplementary Figure 14. Effect of DCA and isoDCA on *R. gnavus* membrane integrity.**

Cell membrane damage caused by exposure of actively dividing *R. gnavus* cells to either DCA or isoDCA was assessed using a propidium iodide (Pi) fluorescence assay. At  $\frac{1}{2}$  MIC (300  $\mu$ M), DCA caused significantly more fluorescence (indicating membrane damage) than isoDCA ( $P = 0.0016$ ), which was comparable to a DMSO control. Importantly, 300  $\mu$ M DCA falls within the range of physiologically relevant DCA concentrations. (DMSO vs. 300  $\mu$ M DCA,  $P = 0.0046$ ; DMSO vs. 600  $\mu$ M isoDCA,  $P = 0.0001$ ). Error bars represent standard deviation. Asterisks represent significant differences between groups, Welch's t test,  $n = 3$  per group.

**Supplementary Table 1. Summary of bacterial strains.**

| <b>Bacterial strain</b>                           | <b>Source</b> | <b>Growth Medium</b>                                   | <b>Assay</b>                                                                             |
|---------------------------------------------------|---------------|--------------------------------------------------------|------------------------------------------------------------------------------------------|
| <i>Clostridium innocuum</i> ATCC 14501            | ATCC          | RCM                                                    | Whole cell screen <sup>a</sup>                                                           |
| <i>Clostridium paraputrificum</i> ATCC 25780      | ATCC          | RCM                                                    | Whole cell screen                                                                        |
| <i>Clostridium scindens</i> VPI 12708             | JCM           | BHI-F                                                  | Whole cell screen                                                                        |
| <i>Clostridium hiranonis</i> DSM-13275            | DSMZ          | BHI-F                                                  | Whole cell screen                                                                        |
| <i>Clostridium hylemonae</i> DSM-15053            | DSMZ          | BHI-F                                                  | Whole cell screen                                                                        |
| <i>Blautia producta</i> ATCC 27340                | ATCC          | EG                                                     | Whole cell screen                                                                        |
| <i>Lachnospiraceae</i> sp. 1_4_56FAA <sup>1</sup> | BEI           | EG                                                     | Whole cell screen                                                                        |
| <i>Lachnospiraceae</i> sp. 2_1_58FAA <sup>2</sup> | BEI           | PYF                                                    | Whole cell screen                                                                        |
| <i>Eubacterium dolichum</i> ATCC 29143            | ATCC          | EG                                                     | Whole cell screen                                                                        |
| <i>Eubacterium eligens</i> ATCC 27750             | ATCC          | PYF                                                    | Whole cell screen, Co-culture <sup>b</sup>                                               |
| <i>Ruminococcus gnavus</i> ATCC 29149             | ATCC          | PY-F, BHI-F                                            | Whole cell screen, Growth inhibition <sup>c</sup> , Cell membrane integrity <sup>d</sup> |
| <i>Eggerthella lenta</i> DSM-2243                 | DMSZ          | BHI-F + 1% Arg w/v <sup>3</sup><br>+ 0.5 mg/mL Cys-HCl | Whole cell screen, Growth inhibition, Co-culture                                         |
| <i>Clostridium sporogenes</i> ATCC 3584           | ATCC          | BHI-F                                                  | Whole cell screen, Growth inhibition                                                     |
| <i>Enterococcus faecalis</i> ATCC 70082           | ATCC          | BHI-F                                                  | Growth inhibition                                                                        |
| <i>Bacteroides thetaiotaomicron</i> ATCC 29148    | ATCC          | TYG or BHI-F                                           | Growth inhibition                                                                        |
| <i>Bacteroides vulgatus</i> ATCC 8482             | ATCC          | TYG or BHI-F                                           | Growth inhibition                                                                        |
| <i>Bacteroides ovatus</i> ATCC 8483               | ATCC          | TYG or BHI-F                                           | Growth inhibition, Cell membrane integrity, Co-culture                                   |
| <i>Bacteroides uniformis</i> ATCC 8492            | ATCC          | TYG or BHI-F                                           | Growth inhibition                                                                        |

<sup>a</sup>Whole cell screen for bile acid metabolism by gut commensal bacteria.

<sup>b</sup>Co-culture of *B. ovatus* with *E. lenta* or *E. eligens* with or without DCA.

<sup>c</sup>Determination of minimal inhibitory concentrations (MICs) for DCA and isoDCA; Growth curves of *B. ovatus* at sub-minimal inhibitory concentrations of DCA and isoDCA.

<sup>d</sup>Effect of DCA and isoDCA on cell membrane integrity.

<sup>1</sup> This reagent was obtained through BEI Resources, NIAID, NIH as part of the Human Microbiome Project: *Lachnospiraceae* sp., Strain 1\_4\_56FAA, HM-161.

<sup>2</sup> This reagent was obtained through BEI Resources, NIAID, NIH as part of the Human Microbiome Project: *Lachnospiraceae* sp., Strain 2\_1\_58FAA, HM-154.

<sup>3</sup> Arginine (at least 0.5%) is necessary for robust growth. Macdonald, I.A., Mahony, D.E., Jellet, J.F. & Meier, C.E. NAD-dependent 3 $\alpha$ - and 12  $\alpha$ -hydroxysteroid dehydrogenase activities from *Eubacterium lentum* ATCC No. 25559. *Biochim. Biophys. Acta* **489**, 466–476 (1977).

**Supplementary Table 2. Primers for cloning candidate 3 $\alpha$ - and 3 $\beta$ -HSDHs from genomic DNA.**

| Gene         | Forward (F) Primer (5' to 3')                                     | Reverse (R) Primer (5' to 3')                                   | Restriction Enzymes                       |
|--------------|-------------------------------------------------------------------|-----------------------------------------------------------------|-------------------------------------------|
| Elen_0358    | CCTGGTGCCGCGCGGCAGCC<br>ATATGAAGTCAAAGCGAGCAG<br>AGTT             | GGTGCTCGAGTGC GGCCGCA<br>AGCTTTTACTTTGCGTCGGCC<br>GTC           | <i>NdeI</i> (F), <i>HindIII</i> Hf (R)    |
| Elen_0359    | CCTGGTGCCGCGCGGCAGCC<br>ATATGGCTCGGTTGATAACA<br>AGATC             | GGTGCTCGAGTGC GGCCGCA<br>AGCTTCTAGAGGCTCTGCCCA<br>CCATC         | <i>NdeI</i> (F), <i>HindIII</i> Hf (R)    |
| Elen_0360    | CCTGGTGCCGCGCGGCAGCC<br>ATATGGAAAGAGAGCGGTTTG<br>TTGAC            | GGTGCTCGAGTGC GGCCGCA<br>AGCTTCTAGGTCAAGCTGAAA<br>CCGCC         | <i>NdeI</i> (F), <i>HindIII</i> Hf (R)    |
| Elen_1987    | CCTGGTGCCGCGCGGCAGCC<br>ATATGACCAACGAAACCGAAA<br>CTCC             | GGTGCTCGAGTGC GGCCGCA<br>AGCTTTCATAGCGACATACCT<br>CCGTCC        | <i>NdeI</i> (F), <i>HindIII</i> Hf (R)    |
| Elen_0198    | CCTGGTGCCGCGCGGCAGCC<br>ATATGTACGACGATCTCAAGG<br>GCAAG            | GGTGCTCGAGTGC GGCCGCA<br>AGCTTCTAGCCCTGCCCGAAC<br>TGG           | <i>NdeI</i> (F), <i>HindIII</i> Hf (R)    |
| Elen_1325    | CCTGGTGCCGCGCGGCAGCC<br>ATATGATGTCAGAAGCACGCC<br>ACAAC            | GGTGCTCGAGTGC GGCCGCA<br>AGCTTCTAGTACGCGCTCCAG<br>CCG           | <i>NdeI</i> (F), <i>HindIII</i> Hf (R)    |
| Elen_2188    | CCTGGTGCCGCGCGGCAGCC<br>ATATGTCGGAACCTCGTAGCAT<br>TGG             | GGTGCTCGAGTGC GGCCGCA<br>AGCTTCTACCCGTTCAACCAG<br>GTG           | <i>NdeI</i> (F), <i>HindIII</i> Hf (R)    |
| Elen_2515    | CCTGGTGCCGCGCGGCAGCC<br>ATATGGACATGGGCTTGAAGG<br>AC               | GGTGCTCGAGTGC GGCCGCA<br>AGCTTTTACGGCTTCATGCCG<br>GAAC          | <i>NdeI</i> (F), <i>HindIII</i> Hf (R)    |
| Elen_1208    | CCTGGTGCCGCGCGGCAGCC<br>ATATGGTCGATTACGGATTGG<br>ACG              | GGTGCTCGAGTGC GGCCGCA<br>AGCTTCTACATCGTGCCAG<br>GGGT            | <i>NdeI</i> (F), <i>HindIII</i> Hf (R)    |
| Elen_0690    | CCTGGTGCCGCGCGGCAGCC<br>ATATGGGCATCTACGTCATCA<br>CC               | GGTGCTCGAGTGC GGCCGCA<br>AGCTTCTAGTAGACTTTCTCG<br>GAATTGAGCAG   | <i>NdeI</i> (F), <i>HindIII</i> Hf (R)    |
| Rumgna_00694 | CCTGGTGCCGCGCGGCAGCC<br>ATATGAATTTTGGAGTTTTAT<br>TATGGGACG        | GGTGCTCGAGTGC GGCCGCA<br>AGCTTTTAGTATGTAGTAAATC<br>CACCATCACTTG | <i>NdeI</i> (F), <i>HindIII</i> Hf (R)    |
| Rumgna_02133 | CCTGGTGCCGCGCGGCAGCC<br>ATATGTTTATGATGTTAAAAA<br>TAAAGTAGCAATTG   | GGTGCTCGAGTGC GGCCGCA<br>AGCTTCTAGCTTCTTGACAGCT<br>CCATC        | <i>NdeI</i> (F), <i>HindIII</i> Hf (R)    |
| Rumgna_00997 | TGCCGCGCGGCAGCCATATG<br>GCTAGCATGGTAAATTTTTCA<br>CTGGAAGGTAAAATTG | GGTGCTCGAGTGC GGCCGCA<br>AGCTTTTATGGCTGTTTTCAA<br>TGATGCC       | <i>NheI</i> Hf (F), <i>HindIII</i> Hf (R) |
| Rumgna_01979 | CCTGGTGCCGCGCGGCAGCC<br>ATATGTTTACAACAAAGTAGT<br>TGTCATC          | GTGGTGGTGCTCGAGTGCGG<br>CCGCTCAATTATTTTCTGATT<br>CAGAGTCCATC    | <i>NdeI</i> (F), <i>NotI</i> Hf (R)       |
| Rumgna_01228 | TGCCGCGCGGCAGCCATATG<br>GCTAGCATGACATTTGAAGGA<br>AAAG TTGTGGCAG   | GTGGTGGTGCTCGAGTGCGG<br>CCGCTTAGCCAAGTGTCATTC<br>CGCCATC        | <i>NheI</i> Hf (F), <i>NotI</i> Hf (R)    |
| Elen_0666    | CCTGGTGCCGCGCGGCAGCC<br>ATATGGCACAAACCGCATTGG<br>TC               | GTGGTGGTGCTCGAGTGCGG<br>CCGCCTACCAGCGATCCCAG<br>CTGATG          | <i>NdeI</i> (F), <i>NotI</i> Hf (R)       |
| Rumgna_00987 | CCTGGTGCCGCGCGGCAGCC<br>ATATGGAGTATGTTATGAACC<br>AGAAATATG        | GTGGTGGTGCTCGAGTGCGG<br>CCGCTTAAATATAACCGCCGT<br>CCAGG          | <i>NdeI</i> (F), <i>NotI</i> Hf (R)       |

**Supplementary Table 3. Assay conditions for determination of kinetic parameters for 3 $\alpha$ - and 3 $\beta$ -HSDHs.**

| <b>Enzyme (concentration)</b> | <b>Substrate (concentration range)</b> | <b>Cofactor (concentration)</b> |
|-------------------------------|----------------------------------------|---------------------------------|
| Rumgna_02133 (72.4 nM)        | DCA (30 – 4,000 $\mu$ M)               | NADP <sup>+</sup> (10 mM)       |
| Elen_0690 (185 nM)            | DCA (100 – 4,500 $\mu$ M)              | NAD <sup>+</sup> (6 mM)         |
| Rumgna_00694 (1 nM)           | 3-oxoDCA (20 – 500 $\mu$ M)            | NADPH (1 mM)                    |
| Elen_0198 (6 nM)              | 3-oxoDCA (250 – 16,000 $\mu$ M)        | NADH (1 mM)                     |
| Elen_1325 (5 nM)              | 3-oxoDCA (250 – 20,000 $\mu$ M)        | NADH (1 mM)                     |



**Supplementary Table 4. Assay conditions for determination of minimal inhibitory concentrations (MICs).**

| <b>Strains</b>                                                                 | <b>Compound</b> | <b>Concentrations</b>                                                                                              |
|--------------------------------------------------------------------------------|-----------------|--------------------------------------------------------------------------------------------------------------------|
| <i>Bacteroides</i> spp.                                                        | DCA             | 50 $\mu$ M, 100 $\mu$ M, 150 $\mu$ M, 200 $\mu$ M, 250 $\mu$ M, 300 $\mu$ M, 350 $\mu$ M, 400 $\mu$ M, 450 $\mu$ M |
| <i>Bacteroides</i> spp.                                                        | isoDCA          | 75 $\mu$ M, 125 $\mu$ M, 250 $\mu$ M, 500 $\mu$ M, 750 $\mu$ M, 1 mM, 1.5 mM                                       |
| <i>E. faecalis</i> , <i>C. sporogenes</i> , <i>R. gnavus</i> , <i>E. lenta</i> | DCA             | 300 $\mu$ M, 400 $\mu$ M, 500 $\mu$ M, 600 $\mu$ M, 700 $\mu$ M, 800 $\mu$ M, 900 $\mu$ M, 1 mM                    |
| <i>E. faecalis</i> , <i>C. sporogenes</i> , <i>R. gnavus</i> , <i>E. lenta</i> | isoDCA          | 500 $\mu$ M, 1 mM, 1.5 mM, 2 mM                                                                                    |
